1 **Relationship between input connectivity, morphology and orientation tuning of layer 2/3**  
2 **pyramidal cells in mouse visual cortex**

3 **Simon Weiler<sup>\*1,2</sup>, Drago Guggiana Nilo<sup>\*1</sup>, Tobias Bonhoeffer<sup>1</sup>, Mark Hübener<sup>1</sup>, Tobias Rose<sup>1,3</sup>,**  
4 **Volker Scheuss<sup>1,4</sup>**

5 <sup>1</sup> Max Planck Institute of Neurobiology, Am Klopferspitz 18, 82152 Martinsried, Germany

6 <sup>2</sup> *current address:* Sainsbury Wellcome Centre, 25 Howland Street, London W1T 4JG, United  
7 Kingdom

8 <sup>3</sup> *current address:* Institute for Experimental Epileptology and Cognition Research, Venusberg-  
9 Campus 1, 53127 Bonn, Germany

10 <sup>4</sup> *current address:* Ludwig-Maximilians-Universität München, Nussbaumstr. 7, 80336 München,  
11 Germany

12 \* equal contribution

13 Keywords: *In vivo* / *in vitro*, calcium imaging, *in vivo* 2-photon imaging, patch-clamp, genetically  
14 encoded calcium indicator, sensory cortex, visual cortex, laser-scanning photostimulation, synaptic  
15 connectivity, L2/3 pyramidal cells

16  
17 **Abstract**

18  
19 Neocortical pyramidal cells (PCs) display functional specializations defined by their excitatory and  
20 inhibitory circuit connectivity. For layer 2/3 (L2/3) PCs, little is known about the detailed relationship  
21 between their neuronal response properties, dendritic structure and their underlying circuit  
22 connectivity at the level of single cells. Here, we ask whether L2/3 PCs in mouse primary visual cortex  
23 (V1) differ in their functional intra- and interlaminar connectivity patterns, and how this relates to  
24 differences in visual response properties. Using a combined approach, we first characterized the  
25 orientation and direction tuning of individual L2/3 PCs with *in vivo* 2-photon calcium imaging.  
26 Subsequently, we performed excitatory and inhibitory synaptic input mapping of the same L2/3 PCs  
27 in brain slices using laser scanning photostimulation (LSPS).

28 Our data from this structure-connectivity-function analysis show that the sources of excitatory and  
29 inhibitory synaptic input are different in their laminar origin and horizontal location with respect to cell  
30 position: On average, L2/3 PCs receive more inhibition than excitation from within L2/3, whereas  
31 excitation dominates input from L4 and L5. Horizontally, inhibitory input originates from locations  
32 closer to the horizontal position of the soma, while excitatory input arises from more distant locations  
33 in L4 and L5. In L2/3, the excitatory and inhibitory inputs spatially overlap on average. Importantly, at

34 the level of individual neurons, PCs receive inputs from presynaptic cells located spatially offset,  
35 vertically and horizontally, relative to the soma. These input offsets show a systematic correlation with  
36 the preferred orientation of the postsynaptic L2/3 PC *in vivo*. Unexpectedly, this correlation is higher  
37 for inhibitory input offsets within L2/3 than for excitatory input offsets. When relating the dendritic  
38 complexity of L2/3 PCs to their orientation tuning, we find that sharply tuned cells have a less complex  
39 apical tree compared to broadly tuned cells. These results indicate that the spatial input offsets of the  
40 functional input connectivity are linked to orientation preference, while the orientation selectivity of  
41 L2/3 PCs is more related to the dendritic complexity.

## 42 43 **Introduction**

44  
45 A fundamental question in neuroscience is how neural activity during sensory processing or behavior  
46 arises from underlying principles at the circuit, cellular and synaptic level. One aspect of this is to  
47 understand the relationship between activity patterns and synaptic connectivity within the neuronal  
48 circuit. The neocortex of mammals by and large displays a universal organization at the circuit level,  
49 with only limited variations between cortical areas and species (reviewed in Douglas & Martin, 2004;  
50 Harris & Shepherd, 2015). This so-called canonical circuit has been extended by additional intra- and  
51 interlaminar connections, the wiring of interneurons and specific subclasses of principal cells, as well  
52 as the identification of subnetworks of preferentially connected sets of neurons across laminae (Harris  
53 & Mrsic-Flogel, 2013). Advances in experimental techniques over the last years have confirmed  
54 previously predicted principles of neuronal organization: 1) Neurons inherit response properties from  
55 their input neurons to some extent, and reciprocally connected cells amplify these cortical responses  
56 (Wertz et al. 2015; Ko et al. 2011; Lien and Scanziani 2013). 2) Cell types with different morphologies,  
57 electrophysiological properties and connectivities display different response characteristics (Vélez-  
58 Fort et al. 2014; Kim et al. 2015). 3) Inhibition contributes to and sharpens the tuning properties of  
59 neurons (Wilson, Scholl, and Fitzpatrick 2018; Liu et al. 2011). However, whether and how specific  
60 connectivity motifs at the circuit level relate to particular stimulus response properties remains unclear.  
61 Here, we address circuit mechanisms of cortical function by exploring the relationship between the  
62 circuit connectivity motifs of individual neurons and their specific response properties in mouse visual  
63 cortex. The retinotopic organization of the visual cortex permits relating the spatial arrangement of  
64 input neurons to the spatio-temporal dynamics in visual space of preferred and non-preferred visual  
65 stimuli, thereby allowing for the inference of functional circuit mechanisms. Basic principles of circuit  
66 models suggested for visual feature selectivity are spatial sampling biases and spatiotemporal offsets  
67 in the integration of stimuli across visual space. For example, orientation tuning is thought to arise  
68 from selectively combining inputs that respond to stimuli at spatial locations laying along the  
69 orientation of the preferred stimulus (Hubel & Wiesel, 1962; Chapman, Zaks, & Stryker, 1991; Alonso  
70 & Reid, 1995) .

71 We focused on L2/3 pyramidal cells because they are at the core of cortical processing, in between  
72 the input and output layers. Although L2/3 is subject to many *in vivo* studies on neuronal function and  
73 plasticity, there is still little mechanistic insight into how exactly response properties arise from  
74 intracortical connectivity. For pyramidal cells in L5 and L6, a correspondence between morphological,  
75 electrophysiological and functional response characteristics has been established and led to the  
76 distinction of several cell types (Vélez-Fort et al. 2014; Kim et al. 2015). Whether pyramidal cells in  
77 L2/3 also consist of different subpopulations has not yet been reported. With respect to circuit  
78 mechanisms, it was shown for example in ferret and mouse visual cortex, at the postsynaptic dendritic  
79 level, that the sum of excitatory inputs predicts the preferred orientation of L2/3 pyramidal cells (Chen  
80 et al. 2013; Wilson et al. 2016), and that the selectivity of orientation tuning depends on functional  
81 clustering of synaptic inputs (Wilson et al. 2016). However, the relationship between neuronal  
82 morphology, circuit connectivity and functional response properties of L2/3 cells has not been  
83 systematically analyzed so far.

84 To address this question, we used a combined structure-connectivity-function analysis. We first  
85 characterized the tuning properties of individual L2/3 PCs in V1 using *in vivo* two photon calcium  
86 imaging. We then reidentified the same L2/3 PCs in acute brain slices and mapped their intra- and  
87 interlaminar excitatory and inhibitory inputs using laser scanning photostimulation (LSPS) by UV  
88 glutamate uncaging (Weiler et al. 2018). Simultaneously, we filled the cells with Alexa-594 and  
89 reconstructed their dendritic tree. We found that the intra- and interlaminar inputs are diverse among  
90 L2/3 PCs, with mostly spatially balanced excitation and inhibition at the population level. On a single  
91 cell level, we found vertical and horizontal offsets of excitatory and inhibitory inputs. These input  
92 offsets were directly related to the preferred orientation of the postsynaptic cell, and L2/3 PCs with  
93 the largest difference between these offsets had preferred orientations that were orthogonal to each  
94 other. While the preferred orientation was related to the cell's synaptic input, the tuning selectivity  
95 was directly related to the apical but not the basal tree complexity. L2/3 PCs with a less complex  
96 apical tree had a higher orientation selectivity compared to cells with a more complex apical tree.

## 97 98 99 **Results**

### 100 **Visual response properties and neuronal circuit connectivity of the same neurons**

101 For studying the relationship between neuronal circuit connectivity motifs and sensory processing, we  
102 recorded both visual response properties and synaptic inputs in the same pyramidal cells (PCs) in  
103 mouse visual cortex (Fig. 1A, Weiler et al., 2018). We sparsely co-expressed GCaMP6m and mRuby2  
104 by viral transduction in the binocular zone of primary visual cortex (bV1) and performed functional and  
105 structural imaging. We recorded neural activity in individual PCs of L2/3, both in the dark and evoked  
106 by eye-specific visual stimuli (Fig. 1C). One day after characterization of visual response properties,  
107 we prepared acute coronal slices containing the imaged PCs and mapped local functional inputs by

108 LSPS (Fig. 1D). Individual PCs that had been imaged *in vivo* were identified by comparing relative  
 109 positions, morphological details, and anatomical landmarks such as blood vessels. This was done in  
 110 both, the top view of an image stack acquired in the slice by structural 2-photon imaging, and the  
 111 corresponding side view in an image stack acquired during *in vivo* imaging (Fig. 1C, D). We recorded  
 112 EPSCs and IPSCs from identified PCs evoked by LSPS via UV-glutamate uncaging for mapping their  
 113 excitatory and inhibitory presynaptic neurons in the different cortical layers

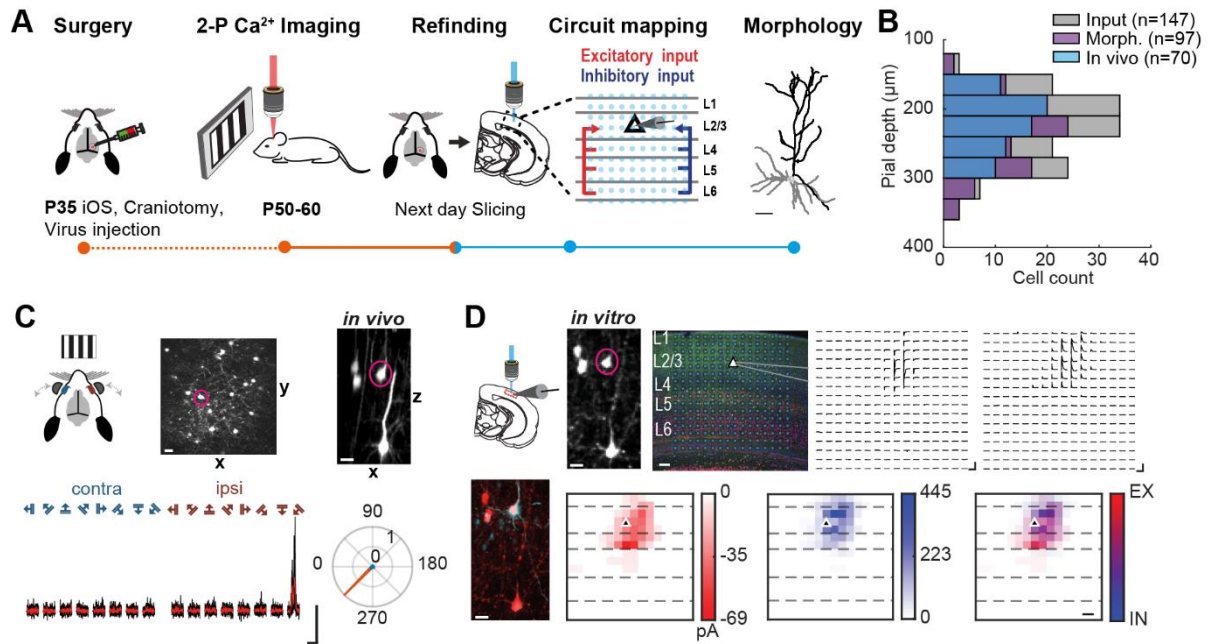

**Figure 1:** *In vivo* / *in vitro* approach to measure visual response properties and corresponding laminar excitatory and inhibitory inputs of L2/3 pyramidal cells in V1.

**A** Experimental *in vivo* / *in vitro* pipeline: GCaMP6m and mRuby2 were expressed in bV1 and the eye-specific orientation/direction tuning of L2/3 PCs was characterized using *in vivo* 2-photon calcium imaging. Subsequently, L2/3 PCs were re-found in acute brain slices and the laminar excitatory and inhibitory inputs were mapped using LSPS by UV glutamate uncaging. Additionally, L2/3 PCs were filled with Alexa-594 to reconstruct their dendritic morphology. Reconstructed L2/3 PC dendritic morphology is from cell shown in C, D (scale bar: 50  $\mu$ m). **B** Distribution of distances to the pial surface of recorded neurons within L2/3. In total, the laminar input of 147 L2/3 PCs was characterized (grey). Subsets of L2/3 PCs that were in addition morphologically reconstructed and/or functionally characterized are indicated with different colors (magenta and blue, respectively). **C, D** Example of an *in vivo* / *in vitro* characterized cell. **C** Independent eye stimulation paradigm (top, depicted in schematic). The L2/3 PC of interest is marked by a circle in the top and side view of the structural image stack obtained *in vivo* (top, maximum intensity projections; scale bar: 25  $\mu$ m). Calcium transients of the cell in response to ipsi- or contralateral eye stimulation with drifting gratings of 8 orientations (bottom). Individual calcium transients are shown in black; average in red (scale bars:  $\Delta R/R_0=200\%$ , 10 s). Polar plot of peak-normalized directional responses to contra- and ipsilateral eye stimulation (blue and red, respectively). **D** Circuit mapping *in vitro*. The L2/3 PC depicted in C is marked by a circle in the *in vitro* side view (top, maximum intensity projection; scale bar: 25  $\mu$ m). Stimulation grid (blue dots) on brain slice with schematic patch pipette on L2/3 PC. Histological labels mark neocortical layers: L2/3, Calbindin (green); L5/6, CTIP2 (red). All cells stained with DAPI (blue, scale bar: 100  $\mu$ m). Excitatory currents (cell clamped to -70 mV) and inhibitory currents (cell clamped to 0 mV; scale bars: 250 pA, 500 ms) evoked at corresponding stimulus grid locations. The cell was filled with Alexa-594 (bottom, cyan). Reconstructed dendritic morphology is shown in A. Pixel-based excitatory (red) and inhibitory (blue) input maps represented with color-coded response amplitudes and overlap of both (scale bar: 100  $\mu$ m).

114 of the slice (16x16 stimulus grid, 69  $\mu$ m spacing, Supplementary Fig. 2-3, Callaway and Katz 1993;  
 115 Shepherd, Pologruto, and Svoboda 2003). In addition, the neuron was filled with Alexa-594, and its  
 116 morphology was assessed by 2-photon imaging, allowing structural analysis of its dendritic tree. In  
 117 total, we recorded the local excitatory and inhibitory synaptic input of 147 L2/3 PCs. For 70 of these  
 118 cells we also characterized the visual tuning properties *in vivo* (pial depths between 150 - 350  $\mu$ m;

119 Fig. 1B). In addition, we obtained the input maps together with the morphology for 97 of all cells  
 120 (n=147), and the visual response properties, input maps and morphology from 32 of all cells (Fig. 1B,  
 121 overview of all cells in Supplementary Fig.1).

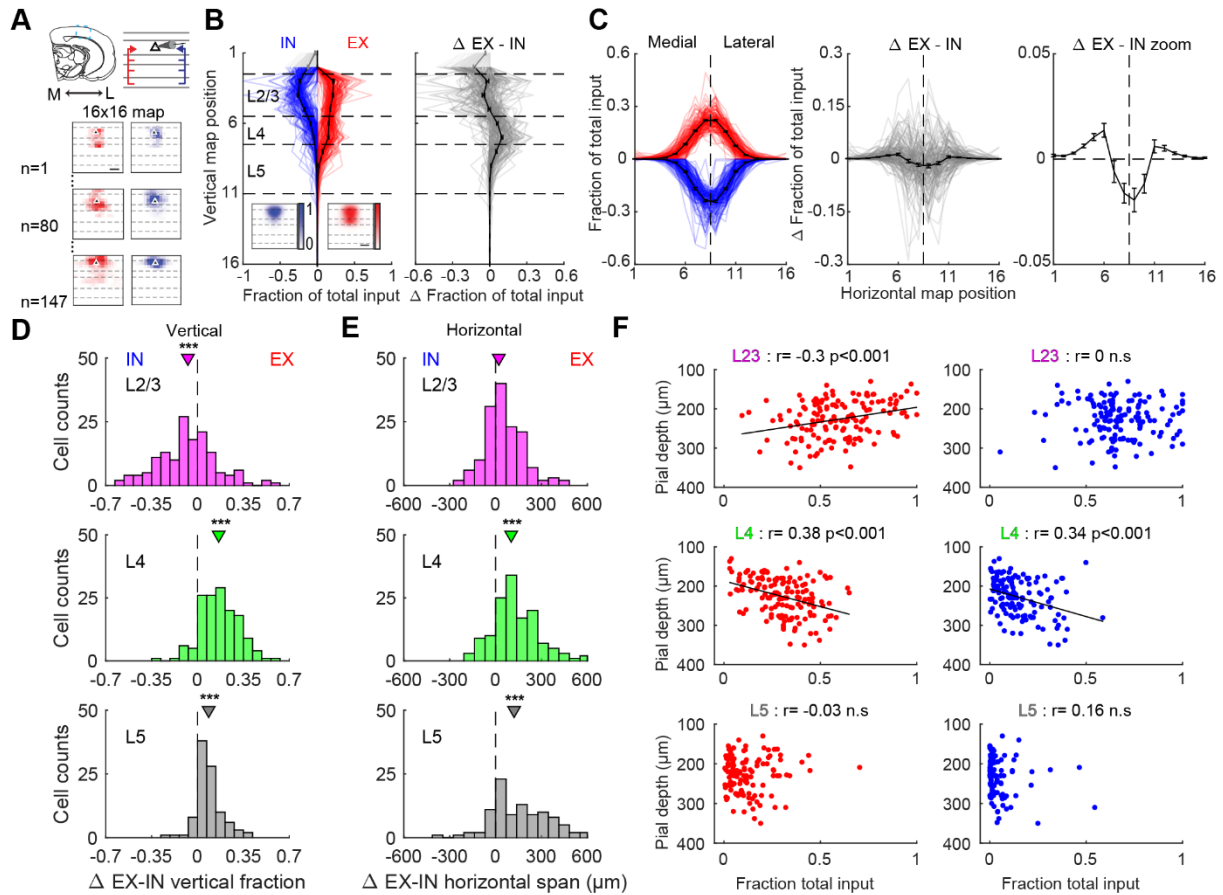

**Figure 2:** Spatial extent and overlap of local excitatory and inhibitory inputs to L2/3 pyramidal cells.

**A** Alignment of input maps to the medial-lateral axis preceding analysis. Representative, peak normalized excitatory and inhibitory inputs maps for three cells (scale bar 100  $\mu\text{m}$ ). **B** Average vertical excitatory (EX, red) and inhibitory (IN, blue) input fraction per stimulus row; thin lines, individual cells (mean  $\pm$  SEM, n = 147, left). Insets depict averaged normalized maps over all cells. Difference between vertical excitatory and inhibitory input fractions (right). Light grey areas in L1 not considered for comparison. **C** Same as B for horizontal excitatory and inhibitory input fraction per column and zoom-in of difference (right). **D** Distributions of differences between excitatory and inhibitory input fraction for L2/3, L4 and L5 (n=147). Triangles indicate mean. **E** Distributions of differences between horizontal extent of input origin for L2/3, L4 and L5 (n=147). Triangles indicate mean. **F** Excitatory (left) and inhibitory (right) input fractions plotted against pial depth for inputs from L2/3, L4 and L5 (n=147). Pearson correlation coefficient r indicated at top of each plot.

122

## 123 Organization of local excitatory and inhibitory inputs to L2/3 pyramidal cells

124 To better understand the basic cortical wiring diagram of L2/3 PCs in bV1, and to assess the spatial  
 125 relationship between their excitatory and inhibitory inputs, we first explored the organization of the  
 126 input maps. Since we recorded excitatory and inhibitory input in the same cells, we were able to  
 127 assess this relationship on a cell to cell basis. We found that input maps showed diverse laminar and  
 128 horizontal synaptic input distributions (Supplementary Fig.1). Figure 2A shows examples of excitatory  
 129 (red) and inhibitory (blue) input maps for three PCs. For further quantification, we aligned the peak-  
 130 normalized inputs to the medial-lateral axis (Fig. 2A) and computed the input fraction per stimulus row  
 131 and column. We excluded any excitatory input from L1 since neurons with somata in L2/3-L5 and

132 apical tuft dendrites in L1 also fired action potentials when their tufts were stimulated in L1 (see  
133 Methods, Supplementary Fig. 3). Vertically, most excitatory and inhibitory input arose from L2/3, less  
134 from L4 and little from L5 (Fig. 2B, left). On average, L2/3 PCs received slightly more inhibition than  
135 excitation from L2/3 itself (Fig. 2B, right). At the level of individual cells, the layer-by-layer excitatory  
136 and inhibitory input was balanced only for a minority of cells. Despite the wide distribution of excitation  
137 and inhibition at the single cell level, a significant number of cells received stronger inhibition than  
138 excitation from L2/3 (Fig. 2D, top, Wilcoxon signed-rank,  $p < 0.001$ ). In contrast, the vast majority of  
139 cells received stronger excitation than inhibition from both L4 and L5 (Fig. 2D, middle and bottom,  
140 Wilcoxon signed-rank,  $p < 0.001$ ). Horizontally, excitatory and inhibitory input was on average centered  
141 on the soma location (Fig. 2C). Interestingly, inhibitory input was more concentrated proximal to the  
142 soma and excitatory input dominated the more distal regions (Fig. 2C, right panels). This observation  
143 was most prominent in L4 and L5, where for the majority of cells, the sources of excitatory input  
144 extended further than the sources of inhibition when comparing their horizontal extent (Fig. 2E, middle  
145 and bottom, Wilcoxon signed-rank,  $p < 0.001$ ).

146 Next, we wanted to better understand if and how the input depends on a cell's depth, i.e. its distance  
147 from the pial surface. As reported for auditory cortex (Meng et al. 2017), we observed that the fraction  
148 of excitatory and inhibitory input from L4 is correlated with the distance between the cell and the pia  
149 (Fig. 2F, middle row,  $r = 0.38$  and  $r = 0.34$ ,  $p < 0.001$ , Pearson's correlation coefficient) with more  
150 superficial cells receiving less fractional excitation and inhibition from L4 in comparison to deeper  
151 cells. In contrast, excitatory input from L2/3 displayed the opposite correlation (Fig. 2F, top row,  $r =$   
152  $0.3$ ,  $p < 0.001$ , Pearson's correlation coefficient). Such correlation was not present for L5 inputs and  
153 inhibitory input from L2/3 (L5 EX,  $r = -0.04$ ,  $p = 0.65$ ; L5 IN,  $r = 0.17$ ,  $p = 0.09$ ; L2/3 IN,  $r = 0$ ,  $p = 0.98$ ,  
154 Pearson's correlation coefficient). This indicates that upper L2/3 PCs, i.e. putative L2 cells, receive  
155 more excitatory input from L2/3 and less from L4 compared to lower layer L2/3 PCs, i.e. putative L3  
156 cells that receive a larger fraction of input from L4.

157

### 158 **Parameters describing local inputs to L2/3 pyramidal cells**

159 Sensory processing of visual stimuli, on a per-cell basis, is partially based on the integration of inputs  
160 that respond to stimuli at different locations in visual space, as observed for orientation tuning (e.g.  
161 Hubel and Wiesel 1962), and visual space is represented on the cortical sheet in a retinotopic fashion  
162 (Dräger, 1975; Wagor, Mangini, & Pearlman, 1980; Schuett, Bonhoeffer, & Hübener, 2002; Garrett et  
163 al., 2014). Selective sampling of visual space by individual neurons might therefore be reflected in the  
164 spatial organization of their inputs. Thus, we explored the vertical and horizontal spatial structure of  
165 the input maps in more detail. First, rather than considering the entire vertical and horizontal input  
166 fractions per layer, we determined the centroids of the input distributions and compared these for  
167 excitation and inhibition originating in the different layers (Fig. 3A-C).

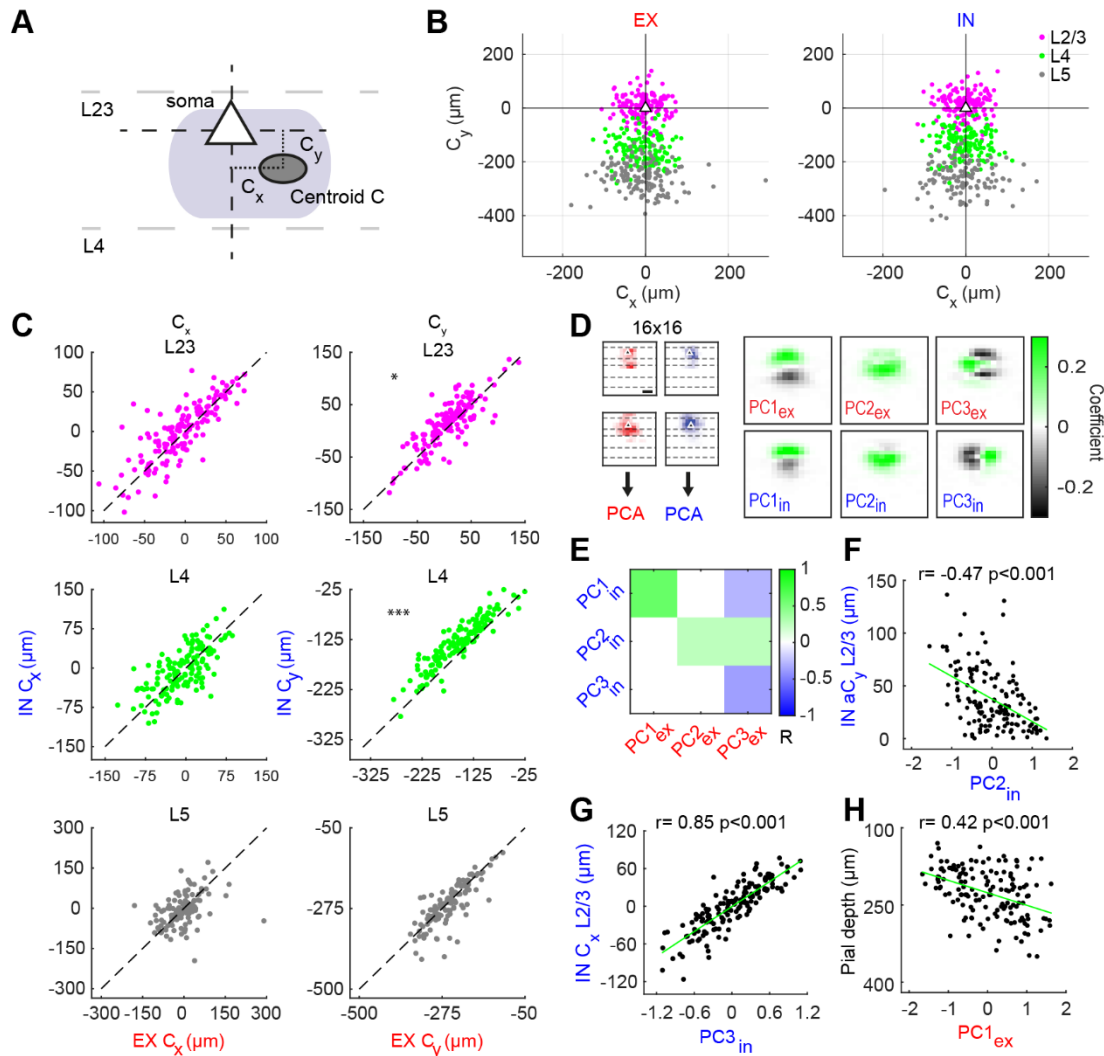

**Figure 3:** The relative position of the centroid explains most of the variance in the input maps.

**A** Schematic depicting the position of the centroid (C) of an input map within L2/3 relative to the cell soma. The horizontal and vertical distances between soma and centroid were determined ( $C_x$  and  $C_y$ ). **B**  $C_x$  and  $C_y$  within L2/3, L4 and L5 for individual cells, both for excitation (left) and inhibition (right,  $n=147$ ). **C**  $C_x$  (left column) and  $C_y$  (right column) of inhibition plotted against  $C_x$  and  $C_y$  of excitation, respectively, in L2/3, L4 and L5. Unity lines are indicated. Asterisks indicate significant differences. **D** Principal component analysis (PCA) using the 16x16 normalized excitatory and inhibitory input maps separately (left). Before PCA, the input maps were vertically and horizontally aligned (see Methods). Input maps corresponding to eigenvalues of the first three principal components for excitation and inhibition (right). **E** Correlations between the first three principal components for excitation and inhibition. Color indicates the Pearson correlation coefficient between the pair of parameters according to the color bar on the right. Coefficients with  $p$  values  $> 0.05$  are set to 0. **F** Absolute  $C_y$  for inhibition plotted against  $PC2_{in}$  within L2/3 ( $n=147$ ). **G**  $C_x$  for inhibition in L2/3 plotted against  $PC3_{in}$  ( $n=147$ ). **H** The distance of the cell from the pia plotted against  $PC1_{ex}$  ( $n=147$ ).

168

169

170

171

172

173

174

175

176

177

The centroid was calculated as the arithmetic mean of the locations of the points in the input map, weighted by their input amplitude, to quantify the spatial offset of the synaptic input distribution in the different layers relative to the soma. The centroid position was described by its horizontal and vertical position with respect to the soma ( $C_x$  and  $C_y$ , Fig. 3A). Figure 3B shows the centroid positions  $C_x$  and  $C_y$  for the excitatory (left) and inhibitory input (right) from L2/3, L4 and L5 for all cells relative to the soma. The centroid positions of excitation and inhibition showed similar distributions centered on the vertical axis. The horizontal spread of the distributions increased from L2/3 through L4 and to L5.  $C_x$  and  $C_y$  of neither excitatory nor inhibitory input centroids were correlated with each other within any layer (Supplementary Fig. 4A). While the excitatory and inhibitory  $C_y$  were significantly correlated with

178 the distance between L2/3 somata and the pia across all layers, this relation was absent for  $C_x$  with  
179 the exception of the inhibitory input from L5 (Supplementary Fig. 4A). While on average the centroids  
180 of excitatory and inhibitory input followed each other in their position along the horizontal axis within  
181 all layers (Fig. 3C, left, Wilcoxon signed-rank, L2/3,  $p=0.38$ ,  $n=147$ ; L4,  $p=0.17$ ,  $n=138$ ; L5,  $p=0.24$ ,  
182  $n=98$ ), there were a number of cells which showed horizontally displaced excitatory and inhibitory  
183 centroids. Vertically, the centroids of excitatory and inhibitory input were significantly different from  
184 each other for L2/3 and L4 but not for L5 (Fig. 3C, Wilcoxon signed-rank, L2/3,  $p=0.34$ ,  $n=147$ ; L4,  
185  $p<0.001$ ,  $n=138$ ; L5,  $p<0.05$ ,  $n=98$ ). On average, the inhibitory centroids were above the  
186 corresponding excitatory centroids in L2/3 and L4 (Fig. 3C).

187 To gain further understanding of the information present in the input distributions of each cell, we  
188 applied principal component analysis (PCA) as an independent and unbiased method for identifying  
189 the primary spatial patterns that underlie the input maps. PCA was performed on the entire set of 16  
190 x 16 pixel input maps, separately for excitation and inhibition (Fig. 3D). Before PCA, the input maps  
191 were horizontally and vertically aligned to the soma (see Methods). The input maps corresponding to  
192 the first three principal components (eigenmaps) for both excitatory and inhibitory inputs are displayed  
193 in Figure 3D. These three components together explained ~60% variance in the data for both  
194 excitation and inhibition (Supplementary Fig. 4B). Inspection of these components revealed that the  
195 respective excitatory and inhibitory principal component weights were significantly correlated with  
196 each other, and in addition the third principal component of excitatory input  $PC3_{ex}$  was correlated with  
197 all inhibitory principal components (Fig. 3E). For comparison, we performed PCA on the combined  
198 excitatory and inhibitory maps, leading to similar results (Supplementary Fig. 4C-E). Moreover, the  
199 principal components were strongly related to the vertical and horizontal spatial features of the input  
200 maps already described above (Supplementary Fig. 4F). In general, these principal components  
201 described i) the relative laminar difference between input from upper and lower layers ( $PC1_{ex}$ ,  $PC1_{in}$ ),  
202 ii) the larger absolute fraction of input from lower layers ( $PC2_{ex}$ ,  $PC2_{in}$ ) and iii) the relative horizontal  
203 difference between input arising medial versus lateral from the soma ( $PC3_{ex}$ ,  $PC3_{in}$ ). For example, the  
204  $PC2_{in}$  weights were significantly correlated with the vertical input offset described by the absolute  
205 distance between soma and inhibitory centroid (absolute value of  $C_y$ ,  $aC_y$ , Fig. 3F,  $r=-0.4$ ,  $p<0.001$ ,  
206 Pearson's correlation coefficient) and  $PC3_{in}$  was strongly correlated with the horizontal inhibitory input  
207 offset described by  $C_x$  (Fig 3G,  $r=0.81$ ,  $p<0.001$ , Pearson's correlation coefficient). Interestingly, four  
208 out of the six principal components were correlated with the pial depth, even though we accounted  
209 for the direct information about cell location before conducting PCA (Fig. 3H,  $PC1_{ex}$  vs. pial depth;  
210  $r=0.42$ ,  $p<0.001$ , Pearson's correlation coefficient; Supplementary Fig. 4F). This indicates that the  
211 input pattern shape itself contains information about the cell location within L2/3.

212 In summary, the main factors characterizing both excitatory and inhibitory circuit motifs are the laminar  
213 differences between inputs as well as the vertical and horizontal input offsets described by  $C_y$  and  $C_x$ .

214



## 215 **Relationship between visual response properties and input map structure**

216 Next we explored whether the observed input circuit motifs were related to the visual response  
217 properties of individual neurons. Figure 4A shows the definition of stimulus orientation angles ( $0^\circ$ ,  
218 horizontal bars moving vertically; increasing angles follow clockwise rotation of the bar pattern  
219 orientation), as well as examples of both, eye-specific orientation tuning curves, and excitatory and  
220 inhibitory input maps for two selected cells. We acquired *in vivo* stimulus response properties and  
221 input maps from 70 cells, from which 54 were responsive to grating stimuli. Figure 4B shows a  
222 comparison of the distributions of the global orientation selectivity index (gOSI, see methods) and  
223 preferred orientation for all cells recorded *in vivo*, and for the subset for which input maps were  
224 acquired. Comparisons between other visual response parameters (ocular dominance, direction  
225 selectivity, preferred direction, tuning width and peak  $\text{Ca}^{2+}$  amplitude), as well as spontaneous activity  
226 parameters, are shown in Supplementary Figure 5.

227 For exploring the relationship between visual response properties and input organization, we  
228 displayed single cell data in two-dimensional UMAP (Uniform Manifold Approximation and Projection)  
229 plots, with an embedding based on a selection of the most distinctive parameters we had identified  
230 previously in the synaptic input maps (excitatory fraction from L4, inhibitory L2/3  $\text{aC}_x$  and  $\text{aC}_y$ , cf. Fig.  
231 2-3), as well as pial depth (Fig. 4C, D). By color-coding the parameter values in the UMAP plots, we  
232 found specific gradients and groupings between the embedded input map parameters: The inhibitory  
233 L2/3  $\text{aC}_x$  displayed a gradient which was mostly orthogonal to the gradients for inhibitory L2/3  $\text{aC}_y$  and  
234 pial depth, illustrated by arrows in Figure 4C. The excitatory L4 fraction displayed a clear gradient  
235 which mostly followed the pial depth gradient. Individual parameters that were not used for embedding  
236 either followed the observed gradients, such as the excitatory  $\text{aC}_x$  within L2/3 and inhibitory  $\text{aC}_x$  within  
237 L4 (Supplementary Fig. 6A), or did not display any specific pattern, such as the inhibitory L2/3 fraction  
238 (Fig. 4C). Similar observations were made for the UMAP plots of the principal components where  
239  $\text{PC1-3}_{\text{in}}$  as well as  $\text{PC3}_{\text{ex}}$  followed the observed gradients (Supplementary Fig. 6B), reflecting the  
240 strong correlations shown in Fig. 3F-H. When inspecting the visual response properties on the UMAP  
241 plot (using the same embedding based on the input map features), we found that of all visual response  
242 parameters, orientation preference (ORI) prominently followed multiple of the gradients described  
243 above, suggesting dependencies between input map features and orientation preference (Fig. 4C,  
244 Supplementary Fig. 6C). The apparent parameter dependencies are quantitatively assessed below  
245 (Fig. 4E). We found significant correlations between the  $\text{aC}_x$  and  $\text{aC}_y$  within L2/3 and orientation  
246 preference. In contrast, no other visual response property, such as orientation and direction  
247 selectivity, as well as ocular dominance, displayed a significant correlation (Fig. 4E, inhibition  $\text{aC}_x$  vs.  
248 ORI,  $cc=0.5$ ,  $\text{aC}_y$  vs. ORI,  $cc=0.46$ ,  $p<0.01$ , circular correlation).

249 In summary, preferred orientation was the strongest link we found between the spatial organization  
250 of input maps and functional response properties; in particular there was a positive correlation  
251 between orientation preference,  $\text{aC}_x$  and  $\text{aC}_y$ . Additionally, the orientation preference displays a

252 dependence on pial depth and on the input fraction from L4. Thus, circuit organization principles  
 253 related to visual response properties are likely driven by multiple parameters acting in parallel.  
 254

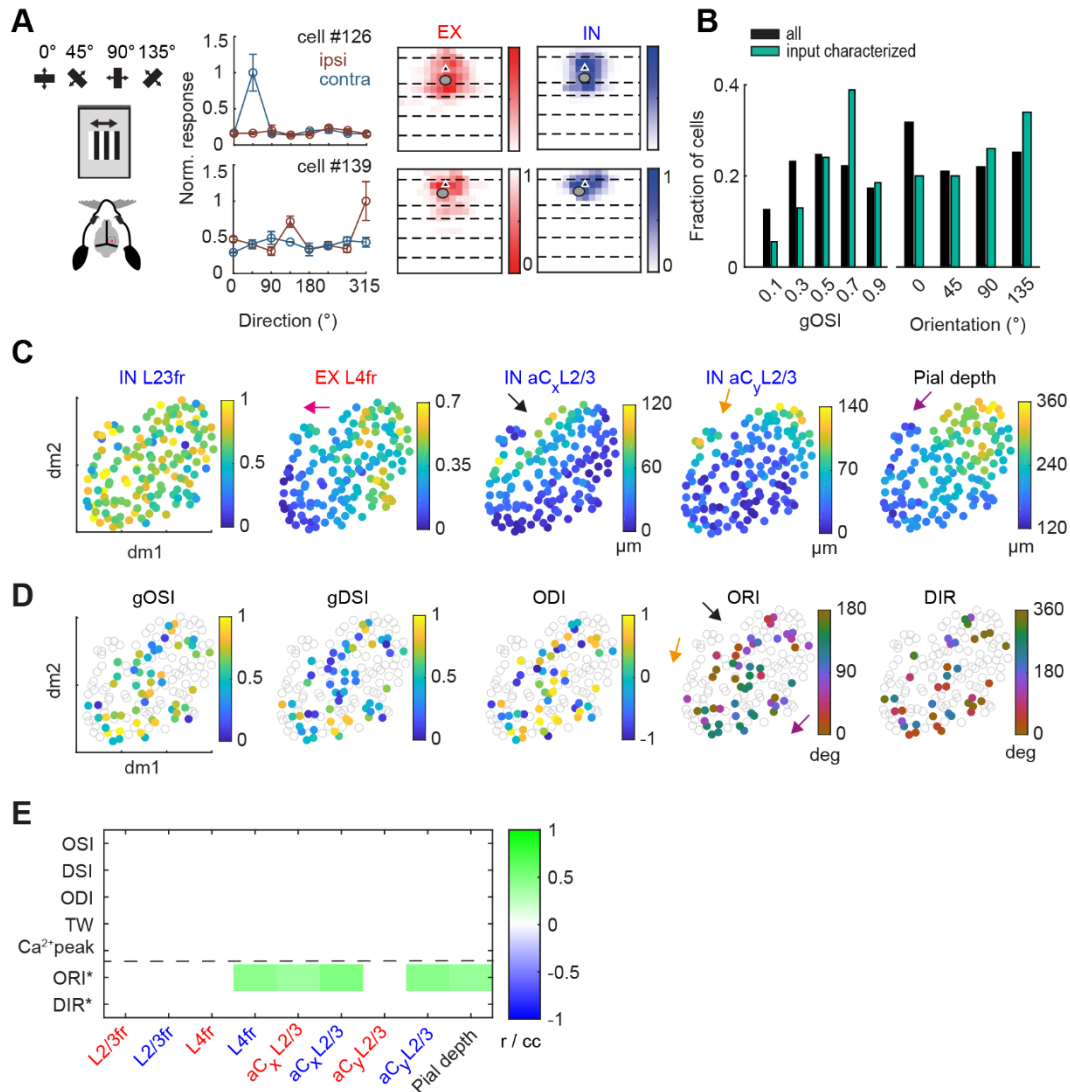

255

## 256 **Relationship between spatial input map offset and orientation preference**

257 To further explore the specific relation between preferred orientation and the spatial organization of  
258 synaptic inputs across layers (Fig. 5A), we focused on the centroid distribution of excitation and  
259 inhibition with respect to orientation preference (Fig. 5B). We observed that for cells preferring  
260 orientations around  $125^\circ$  the L2/3 centroids of excitatory and inhibitory input were located closer to  
261 the soma, and, as the radial distance from the soma increased, the orientation preference shifted to  
262 around  $35^\circ$  (Fig. 5B). This was also true for the inhibitory input within L4 (Fig. 5B, right).

263 We first analyzed the relationship between the vertical component of the centroid offset and the  
264 preferred orientation, given the strong pial dependence we had found among input distribution  
265 parameters (Supplementary Fig. 4) and the potential presence of sublamina subdivisions as  
266 observed in auditory cortex (Meng et al. 2017). For this, we computed the rolling average of  $aC_y$   
267 across preferred orientation for excitatory and inhibitory maps within L2/3 (Fig. 5C). This distance  
268 displayed a sinusoidal relation to the orientation preferences (Fig. 5C). When comparing the two  
269 orientation ranges best separated by  $aC_y$ , ( $\sim 35^\circ$  and  $\sim 125^\circ$ ), L2/3 PCs that preferred orientations  $\sim 35^\circ$   
270 had a significantly larger vertical offset of their presynaptic inputs compared to cells preferring  
271 orientations  $\sim 125^\circ$ , for both excitation and inhibition (Wilcoxon rank-sum,  $p < 0.01$ ; Fig. 5D).  
272 Interestingly, the vertical centroid offset was more pronounced for inhibition compared to excitation  
273 (as observed above across the entire population, see Fig. 3C). Moreover, cells preferring  $\sim 35^\circ$   
274 received stronger L4 synaptic input compared to cells preferring  $\sim 125^\circ$ , further distinguishing the input  
275 connectivity between these two groups of cells (Wilcoxon rank-sum, excitation:  $p < 0.05$ , inhibition:  
276  $p < 0.01$ , Fig. 5E). To better understand this relationship, we computed rolling averages with the  
277 components of  $aC_y$ , namely pial depth of the soma and depth of the centroid. Both of them were  
278 different between cells preferring  $\sim 35^\circ$ , located closer to the L4 border, and cells preferring  $\sim 125^\circ$ ,  
279 located closer to the L1 border (Supplementary Fig. 7A-C), although pial depth correlated better with  
280 the separation. Therefore, while the best measure linking orientation preference and input map  
281 distribution vertically is  $aC_y$ , this seems to be mostly determined by pial depth, with only a small  
282 component dependent on the relative positions of centroid and soma (Fig. 5K).

283 Next, we focused on the horizontal component of the centroid offset. PCs preferring  $\sim 35^\circ$  had a larger  
284 horizontal inhibitory input offset than cells preferring  $\sim 125^\circ$  (Wilcoxon rank-sum, excitation:  $p = 0.06$ ,  
285 inhibition:  $p < 0.01$ , Fig. 5F, G). The horizontal inhibitory offset was also preserved across layers, with  
286 the horizontal position for the inhibitory centroids within L2/3 and L4 being significantly correlated for  
287 both groups of preferred orientations (Fig. 5B, H). In contrast to the vertical offset, the horizontal offset  
288 was independent of the soma location with respect to the pial surface (Supplementary Fig. 7D). As a  
289 last step, we quantified the overall synaptic input offset as the centroid distance to the soma ( $C_d$ ), and  
290 found an even stronger correlation to the preferred orientation (EX:  $cc = 0.44$   $p < 0.01$ , IN:  $cc = 0.56$ ,  
291  $p < 0.001$ , circular correlation) arguing that both the described vertical and horizontal input offset are  
292 linked to the overall orientation preference (Fig. 5J).

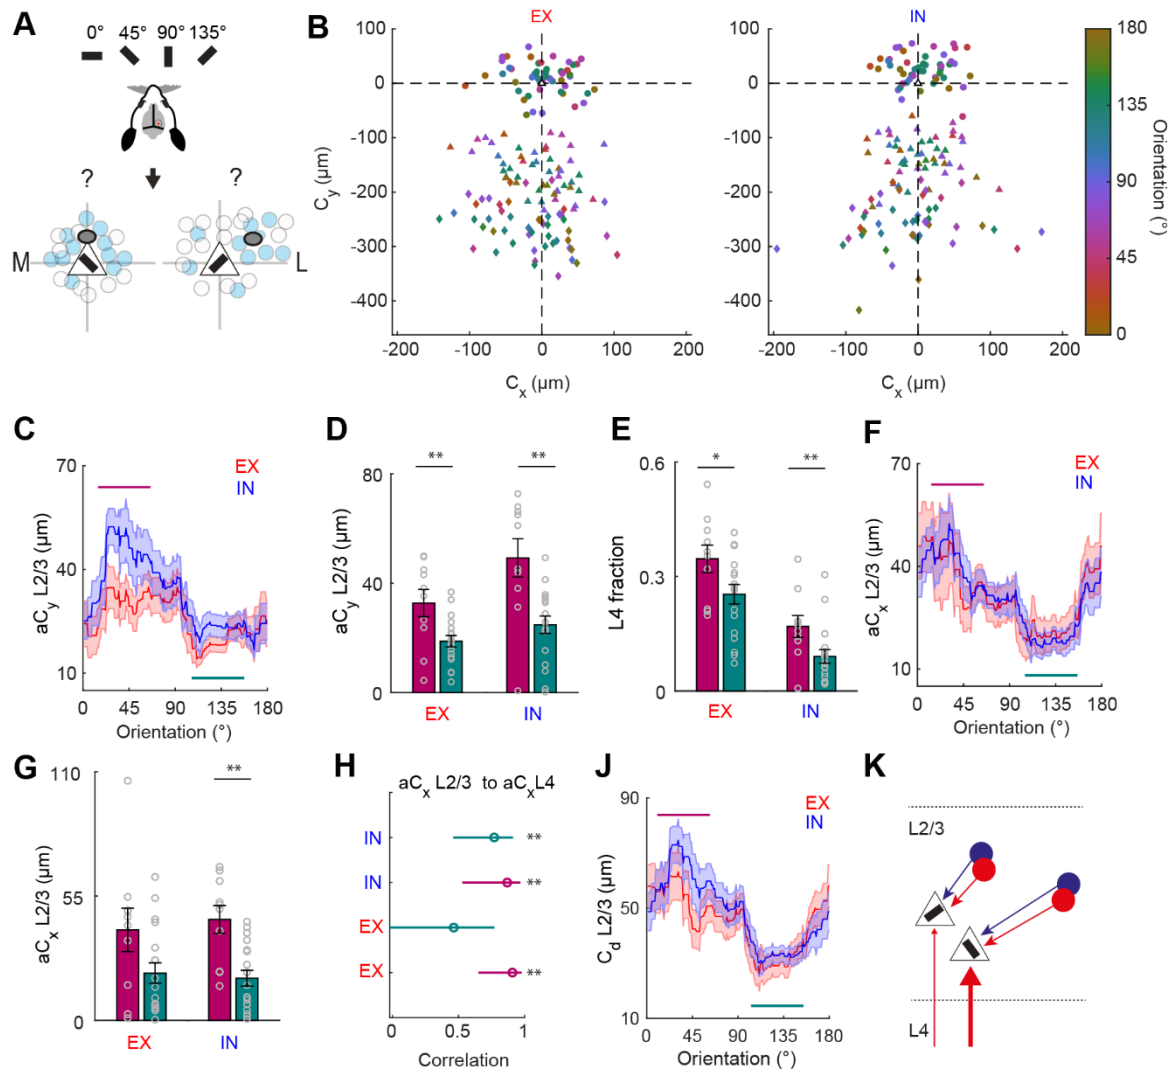

**Figure 5:** The synaptic input offset is linked to orientation preference.

**A** Schematic displaying the gratings presented to the mouse, and the potential relative positions of the presynaptic input map centroid for two L2/3 PCs with orthogonal preferred orientations. **B** Centroid offsets  $C_x$  and  $C_y$  for L2/3 (circles), L4 (triangles) and L5 (diamonds) cells, color coded based on the cell's preferred orientation ( $n=50$ ) for excitation (left) and inhibition (right). Only cells with  $gOSI > 0.25$  are included. The white triangle marks the position of the cell soma. **C** Rolling average of excitatory (red) and inhibitory (blue)  $aC_y$  in L2/3 across orientation preference using a window size of  $45^\circ$ . The SEM is indicated as the shaded area. Turquoise and purple lines mark the angle ranges utilized for the comparison in the following panels ( $50^\circ$  ranges:  $10-60^\circ$ ,  $100-150^\circ$ , EX:  $cc=0.3$ ,  $p=0.06$ , IN:  $cc=0.46$ ,  $p<0.01$ ). **D** Comparison of the average  $aC_y$  in L2/3 for the two highlighted sectors in panel C for excitation (left) and inhibition (right). Individual data points are superimposed ( $n=10$ ,  $n=18$ ). One-tailed Wilcoxon rank-sum. **E** Comparison of the average fraction of input originating in L4 for the two groups of angles indicated in panel C. One-tailed Wilcoxon rank-sum. **F** Same as in C for  $aC_x$  ( $n=50$ , EX:  $cc=0.39$ ,  $p<0.05$ , IN:  $cc=0.5$ ,  $p<0.001$ ). **G** Same as in D for  $C_x$  ( $n=10$ ,  $n=18$ ). One-tailed Wilcoxon rank-sum. **H** Interlaminar (L2/3-L4) Pearson correlation of  $aC_x$  for excitation and inhibition. Error bars are 95% confidence intervals. **J** Same as in C for the distance between the soma of the cell and the centroid ( $C_d$ ,  $n=50$ , EX:  $cc=0.44$ ,  $p<0.01$ , IN:  $cc=0.56$ ,  $p<0.001$ ). **K** Schematic summarizing observed vertical and horizontal input offsets for excitation and inhibition and its relation to orientation preference.

293 Taken together, these intracortical vertical and horizontal input offsets with respect to the postsynaptic  
 294 cell (Fig. 5K) represent the first reported link between the functional intra- and interlaminar input  
 295 distribution of a cell and one of its visual response properties, namely orientation preference.

296

297

## 298 **Relationship of orientation selectivity to dendritic morphology**

299 Finally, we explored how the dendritic structure of L2/3 PCs was related to their tuning properties and  
300 intracortical connectivity. To this end, we reconstructed the dendritic morphologies of 97 L2/3 PCs for  
301 which we had determined their synaptic input connectivity. From 32 of these cells, we additionally  
302 obtained visual response properties.

303 PCs displayed a morphological continuum across L2/3 when considering the appearance of their  
304 apical tree (Supplementary Fig, 8A). PCs in lower L2/3 displayed a long apical dendrite with a tuft,  
305 whereas PCs in upper L2/3 had shorter but wider apical trees that branched profusely in L1 as  
306 previously described (Gouwens et al. 2019).

307 The apical and basal dendritic trees of L2/3 PCs have been shown to play distinct roles in sensory  
308 processing. Feed-forward inputs from L2/3 and L4 influence orientation preference of L2/3 PCs (Ko  
309 et al. 2011; Lee et al. 2016), most likely targeting basal dendrites (Young et al. 2019; Feldmeyer,  
310 Lübke, and Sakmann 2006). In contrast, cortico-cortical feedback inputs (Nassi, Lomber, and Born  
311 2013; Wang et al. 2007; Smith et al. 2013) as well as orientation-tuned thalamocortical inputs (Chen  
312 et al. 2013; Roth et al. 2016) are likely to shape orientation selectivity via the apical dendrite.  
313 Therefore, we explored the relationship of apical and basal tree structure to tuning properties. The  
314 global orientation selectivity, tuning width as well as orientation preference of reconstructed L2/3 PCs  
315 covered the full parameter range displayed by all *in vivo* sampled cells (gOSI: 0.11-0.98, TW: 10.75-  
316 36.8°, ORI: 11.24-178.1°). Comparison of the examples of reconstructed dendritic morphologies of  
317 L2/3 PCs and their corresponding tuning curves in Figure 6A, B suggested that the apical tree  
318 morphology varies with tuning width.

319 For a quantitative assessment of the spatial extent of the apical and basal tree, we extracted three  
320 morphological features related to dendritic length and two parameters related to dendritic complexity  
321 (Fig. 6C, Supplementary Fig. 8B, C, Sholl analysis, see Methods). Regarding dendritic complexity,  
322 we found a significant correlation between the tuning width and the peak number of Sholl crossings,  
323 as well as the total number of branch points of the apical tree (Fig. 6D, F, peak number of Sholl  
324 crossings,  $r=-0.53$ ,  $p<0.01$ ; number of branch points,  $r=0.36$ ,  $p<0.05$ ). Similar observations were made  
325 for the gOSI (Supplementary Fig. 8D, Fig. 6F). In contrast, the basal tree morphology did not show  
326 such correlations (Fig. 6E, F, Supplementary Fig. 8E,  $r=-0.09$ ,  $p=0.52$ ;  $r=0.15$ ,  $p=0.53$ ). Furthermore,  
327 for both the apical and basal trees, none of the measures for spatial extent or length significantly  
328 correlated with orientation selectivity nor tuning width (Fig. 6F). Moreover, none of the morphological  
329 parameters displayed a relation with the preferred orientation or other visual response properties (Fig.  
330 6F). Noteworthy, while the maximal radial distance from the soma and the ratio between maximum  
331 horizontal and vertical extent of the dendrites displayed a pial depth dependency, the dendritic  
332 complexity as well as total length were independent from the pial depth of the soma (Fig. 6F). Finally,  
333 there was no relation between the summed excitatory or inhibitory input and apical as well as basal

334 tree complexity (Fig. 6G, Supplementary Fig. 8F, apical, EX:  $r=-0.04$ ,  $p=0.73$ ; IN:  $r=-0.18$ ,  $p=0.08$ ,  
 335 basal, EX:  $r=0.12$ ,  $p=0.23$ , IN:  $r=-0.09$ ,  $p=0.38$ ).

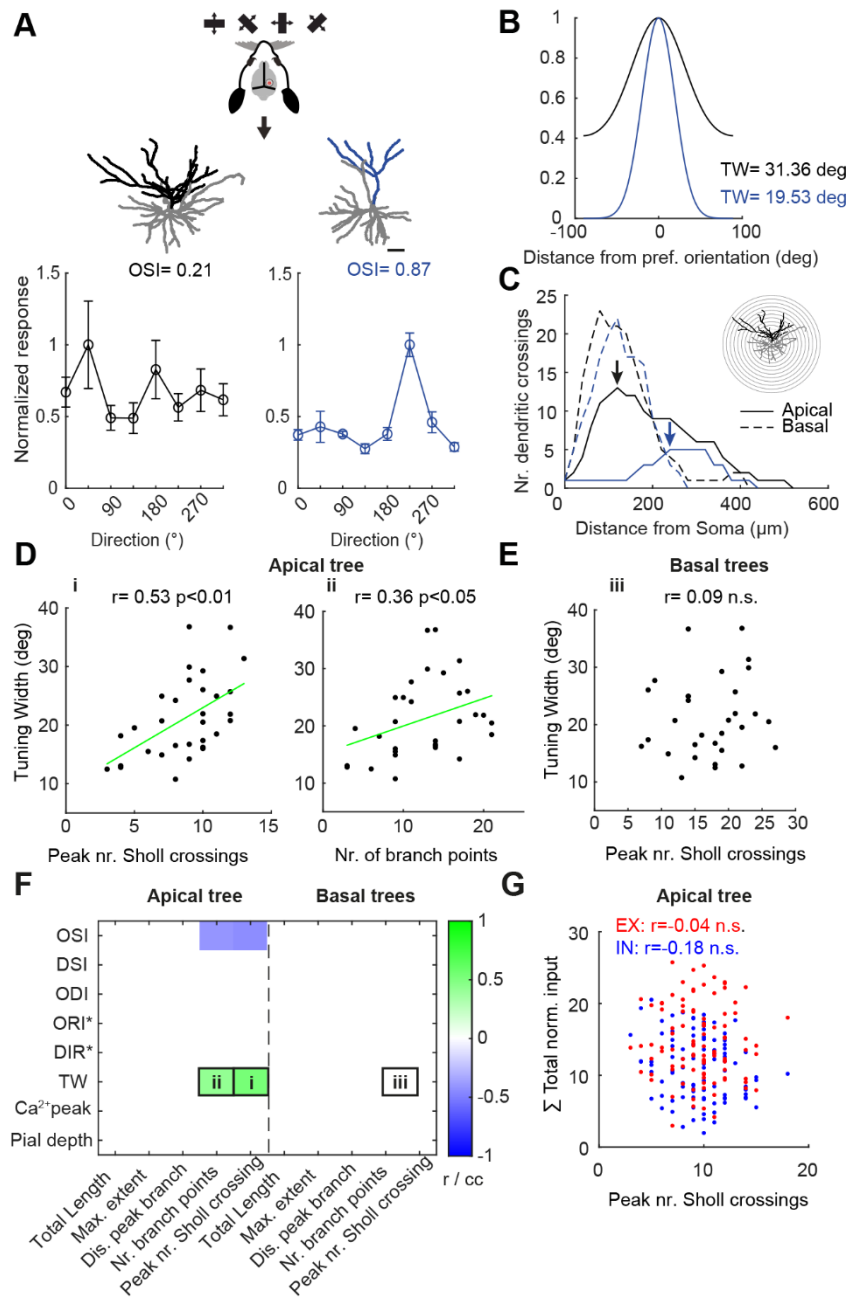

**Figure 6:** Apical but not basal dendritic complexity is related to the tuning width of L2/3 pyramidal cells.

**A** Representative basal (grey) and apical dendritic morphologies (black/blue) of L2/3 PCs with low (left) and high orientation selectivity (right, pial depth: 190 and 220  $\mu\text{m}$ ). Normalized orientation tuning curves and OSI for the two depicted cells displayed at the bottom (mean  $\pm$  SEM,  $n=4$ ). **B** Gaussian fit of the tuning curves centered on the preferred orientation for the cells shown in A. Tuning width (TW) was determined as the full width at half maximum and is indicated on the right. **C** Sholl analysis for apical and basal dendritic trees for the two cells shown in A. The number of crossings was determined using concentric spheres centered around the soma at 20  $\mu\text{m}$  increments. Arrows indicate the peak number of crossings of the apical trees. **D** TW plotted against the peak number of Sholl crossings (i in F) and against the number of branch points (ii in F) of the apical tree ( $n=32$ ). **E** Tuning width plotted against the peak number of Sholl crossings of the basal trees (iii in F). **F** Correlations between visual response properties and morphological features. Colors indicate the Pearson correlation or circular correlation coefficient (cc) between the pair of parameters according to the color bar on the right. Total length, maximal extent and distance of peak branch (Dis. peak branch) are in  $\mu\text{m}$ . Coefficients with  $p$  values  $> 0.05$  are set to 0. For ORI and DIR, cells were subsampled based on  $g\text{OSI} > 0.25$  and  $g\text{DSI} > 0.25$ , respectively. **G** The sum of the total normalized excitatory input plotted against the peak number of Sholl crossings of the apical trees ( $n=97$ ).

336 Together, these results suggest that L2/3 PCs with narrow tuning width have a less complex apical  
337 dendritic tree than more broadly tuned L2/3 PCs. The complexity of the basal tree does not follow this  
338 rule.

339

## 340 **Discussion**

341 We used a combined structure-connectivity-function analysis to directly link dendritic morphology and  
342 functional excitatory and inhibitory input patterns to the tuning properties of individual L2/3 PCs in  
343 binocular V1. We found that the strongest excitatory and inhibitory inputs to L2/3 PCs are within L2/3,  
344 while inputs from L4 and L5 are mainly dominated by excitation. Horizontally, the excitatory and  
345 inhibitory inputs follow the shape of an inverted Mexican hat, with inhibitory input originating from  
346 locations closer to the soma and excitatory input from more distant locations. Using unbiased feature  
347 extraction, we found that vertical and horizontal input offsets of excitation and inhibition are the  
348 features underlying most variance in the input distribution across cells. We quantified these spatial  
349 offsets via the input centroids. Exploring their relationship to visual response properties, we observed  
350 that centroid location was directly connected to the preferred orientation of the cells: L2/3 PCs with  
351 the largest difference between centroid offsets with respect to the soma preferred orientations that  
352 were orthogonal to each other. Moreover, the amount of L4 input to L2/3 PCs was different for cells  
353 preferring orthogonal orientations. This suggests that the strength as well as the spatial location of  
354 presynaptic inputs with respect to the postsynaptic soma are an important contributor to orientation  
355 preference. With respect to stimulus tuning properties, we found that orientation selectivity was  
356 directly related to the dendritic complexity of L2/3 PCs: Sharply tuned L2/3 PCs had a less complex  
357 apical tree compared to broadly tuned cells. Neither dendritic structure nor input connectivity was  
358 directly related to the ocular dominance of L2/3 PCs, arguing against eye-specific intracortical  
359 connectivity motifs at the level of L2/3.

360 Taken together, these results suggest an important role for both the intra- and interlaminar  
361 connectivity and dendritic structure of L2/3 PCs in shaping orientation tuning.

362

### 363 **Excitatory and inhibitory inputs to L2/3 PCs**

364 A previous study on functional connectivity using the same LSPS approach for input mapping,  
365 suggested global spatial balance between excitation and inhibition across L2/3, L4 and L5 in V1 (Xu  
366 et al. 2016). In this study, however, the excitatory and inhibitory inputs were mapped in separate sets  
367 of L2/3 PCs. In the present study, we obtained the excitatory and inhibitory input to L2/3 PCs in the  
368 same cells, enabling a direct comparison of spatial overlap between excitation and inhibition. We  
369 found that, on average, excitatory and inhibitory inputs do indeed spatially overlap across layers, but  
370 on a single cell level the input organization is much more diverse and comparable to the diverse  
371 distribution of excitatory and inhibitory synaptic inputs to L2/3 PCs seen in auditory cortex (Meng et  
372 al. 2017). L2/3 PCs received stronger local inhibitory connections within L2/3 compared to excitation,

373 inputs from L4 were dominated by excitation, and L5 excitatory inputs were rarely spatially balanced  
374 by inhibition or vice versa. Vertically, the strongest connections to L2/3 PCs were within L2/3 for both  
375 excitation and inhibition. Previous studies analyzing the number of presynaptic cells connected to  
376 L2/3 PCs using monosynaptic rabies tracing reported the highest number of presynaptic excitatory  
377 cells in L4 rather than L2/3 (Wertz et al. 2015; Rossi, Harris, and Carandini 2019). This discrepancy  
378 could be explained by the differences in purely structural vs. functional synapses formed between  
379 pre- and postsynaptic cells. While monosynaptic rabies tracing reveals structural connectivity, LSPS  
380 reveals functionally connected cells. Indeed, paired recordings show that the connection probability  
381 as well as synapse strength is higher between L2/3->L2/3 compared to L4-> L2/3 cells within V1  
382 (Morgenstern, Bourg, and Petreanu 2016).

383 Horizontally, synaptic input distribution is organized as an inverted Mexican hat, with inhibitory input  
384 located close to the vertical axis through the L2/3 PC soma, and excitatory input extending more  
385 distally when including inputs across all layers. In L2/3, however, the horizontal extent was on average  
386 similar for excitation and inhibition, in contrast to L4 and L5. This differs from anatomical results  
387 obtained using cell reconstructions and monosynaptic rabies tracing, where excitatory inputs have  
388 been shown to display broader distribution relative to inhibition (Binzegger, Douglas, and Martin 2007;  
389 Rossi, Harris, and Carandini 2019). Again, this could be explained by the structure-function  
390 discrepancy.

391 The excitatory and inhibitory inputs with respect to cells in upper and lower L2/3 cells can be  
392 distinguished based on their ascending input from L4. L2/3 PCs close to the L4 border received more  
393 L4 excitatory as well as inhibitory input compared to L2/3 PCs close to the L1 border. This is similar  
394 to the auditory cortex, where L2/3 PCs were subdivided into L2 and L3 based on their degree of L4  
395 input (Meng et al. 2017) arguing for common circuits schemes across sensory brain areas.

396

### 397 **Relationship of intra- and interlaminar circuits to tuning properties of L2/3 PCs**

398 How orientation tuning is computed or amplified through intracortical excitatory and inhibitory circuits  
399 in L2/3 is still debated. Several studies have demonstrated that local as well as long-range intracortical  
400 connectivity of similarly tuned cells follows certain rules. For example, L2/3 PCs responding to similar  
401 stimulus features share strong local excitatory reciprocal connections within V1 (Cossell et al. 2015).  
402 Moreover, besides the strength of connectivity, the location of presynaptic receptive fields in visual  
403 space has been shown to correlate with a cell's orientation tuning: Neurons preferring the same  
404 orientation tend to connect to each other when their receptive fields are aligned along the axis of their  
405 preferred orientation (Schwarz and Bolz 1991; Bosking et al. 1997; Iacaruso, Gasler, and Hofer 2017;  
406 Rossi, Harris, and Carandini 2019). Our results demonstrate that the spatial arrangement of  
407 presynaptic soma locations in cortical space, weighted by the synaptic input strength, are related to  
408 the preferred orientation of the postsynaptic cell. We observe both a vertical and a horizontal input  
409 offset, which most likely can be attributed to different circuit mechanisms.



410 According to retinotopic mapping, a bar with an orientation of  $\sim 135^\circ$  would align along a coronal brain  
411 slice (as we have used), whereas a bar of the orthogonal orientation ( $\sim 45^\circ$ ) would be pointing into  
412 and out of the slice (Garrett et al. 2014). This arrangement, together with the aforementioned  
413 relationship between cortical space layout of the presynaptic cells and orientation preference of the  
414 postsynaptic cell, yields two hypotheses: 1) the horizontal extent of the presynaptic input should differ  
415 between the aligned and the orthogonal bar. 2) Any anisotropic distribution of presynaptic cells in  
416 cortical space related to the postsynaptic cell's preferred orientation should become apparent. We  
417 found that the horizontal span of the spatial input distribution indeed tends to be larger for PCs  
418 preferring the orientation aligned with the slice ( $\sim 125^\circ$ ) compared to PCs preferring the orthogonal  
419 orientation (Supplementary Figure 6B). In addition, in PCs preferring the orthogonal orientation ( $\sim 35^\circ$ )  
420 the input centroids are more offset from the soma (Figure 5B), meaning these input distributions have  
421 an asymmetry perpendicular to the long axis of the input distribution. Because this asymmetry would  
422 point into/out of the slice in PCs preferring the orientation aligned with the slice ( $\sim 135^\circ$ ), their apparent  
423 input centroids are located close to the soma in our preparation. However, how our measurements in  
424 cortical space compare to the detailed distribution of the presynaptic cells in visual space must be  
425 measured in future studies.

426 Besides horizontal connectivity, the vertical input within and across layers could potentially influence  
427 the orientation tuning. Generally, anisotropies in the preferred orientation of neurons have been  
428 observed within L2/3 and across other layers in visual cortex (Kreile, Bonhoeffer, and Hübener 2011;  
429 Sun et al. 2016). The bias in orientation preference of L2/3 PCs in the upper and lower part of L2/3  
430 observed in our study (Supplementary Fig.7 A-C, E) was accompanied by a difference in vertical input  
431 connectivity from L2/3 and L4. Lower L2/3 PCs could in principle directly inherit their orientation  
432 preference from connected L4 cells. We found that L2/3 PCs that prefer orientations of  $\sim 35^\circ$  indeed  
433 receive stronger synaptic input from L4, and are also located mostly in the lower part of L2/3. Cells  
434 preferring the orthogonal orientation of  $\sim 125^\circ$  could be embedded in a different cortical network.

435 We found that, while both the excitatory and inhibitory inputs spatially overlap to a large degree, the  
436 inhibitory input offset is more strongly related to the orientation preference than the excitatory offset.  
437 This could indicate that orientation preference is linked to specific inhibitory connectivity. Inhibitory  
438 cells have been shown to strongly inhibit those pyramidal cells that provide them with strong excitation  
439 and share their response selectivity, indicating that there is specific inhibitory connectivity in a  
440 recurrent intracortical network (Znamenskiy et al. 2018; Cossell et al. 2015).

441

#### 442 **Orientation selectivity and dendritic structure**

443 We found that sharply orientation tuned L2/3 PCs have a less complex apical tree compared to  
444 broadly tuned cells. In general, it has been demonstrated that tuning width correlates with the degree  
445 of dendritic non-linearities caused by clustering of spines with similar tuning (Wilson et al. 2016; Smith  
446 et al. 2013). This applies to both the apical and basal tree. It is conceivable that such non-linearities

447 become more important the fewer dendritic branches a L2/3 PC has. However, we only found a  
448 significant correlation between the apical, not basal, dendritic complexity and tuning width. Therefore,  
449 it is likely that additional mechanisms shaping orientation selectivity are specific to the apical dendrite.  
450 Whereas basal dendritic trees receive local feedforward input via L2/3 and L4, apical dendrites of L2/3  
451 PCs in V1 receive orientation tuned input via at least four different sources: 1) projections from the  
452 LGN (Cruz-Martín et al. 2014) 2) projections from lateral posterior thalamus (Roth et al. 2016) 3)  
453 feedback cortico-cortical projections from higher visual areas (Nassi, Lomber, and Born 2013; Wang  
454 et al. 2007; Yang et al. 2013) and 4) inhibitory inputs targeting the apical dendrite (Chiu et al. 2013).  
455 These input sources carry diverse tuning, and have been shown to directly modulate the orientation  
456 selectivity of L2/3 PCs. Silencing of feedback projections from higher visual areas has been shown to  
457 reduce orientation selectivity, without altering the orientation preference of the postsynaptic cell  
458 (Nassi, Lomber, and Born 2013).

459 A plausible explanation for our observation is that a more complex apical dendrite enables denser  
460 sampling from nearby axons per area, given the larger axodendritic overlap (Shepherd et al. 2005).  
461 This would favor the formation of more synapses between presynaptic inputs with diverse tuning,  
462 originating from the above listed sources. Therefore, the integration of these diverse inputs would lead  
463 to a broader somatic tuning of the postsynaptic L2/3 PC. A less complex apical tree would have less  
464 axodendritic overlap, and simply sample from less nearby axons, leading to less modulatory effect on  
465 the postsynaptic orientation tuning from input sources 1-4 (Shepherd et al. 2005). Importantly, long-  
466 range feedback or feedforward input cannot be activated via glutamate uncaging. We do not find any  
467 relation between total synaptic input measured with LSPS and apical tree complexity in this study,  
468 supporting the idea of the modulatory effect of long-range inputs.

469 In conclusion, we show that specific visual response properties of L2/3 principal cells in mouse visual  
470 cortex are related to trans- and intralaminar circuit connectivity motifs as well as cellular morphology.

471

## 472 **Methods**

473

474 **Animals** All experimental procedures were carried out in compliance with institutional guidelines of  
475 the Max Planck Society and the local government (Regierung von Oberbayern). Wild type C57bl/6  
476 female mice (postnatal days P28-P70) were used. Craniotomy, virus injections and head plate  
477 implantation were performed at P30-P35. *In vivo* imaging and subsequent *in vitro* brain slice  
478 experiments were performed at P50-P70.

479

480 **Virus preparation and dilution** The GEC1 AAV2/1-Syn-FLEX-mRuby2-CSG-P2A-GCaMP6m-  
481 WPRE-SV40 (titer:  $2.9 \times 10^{13}$  GC per ml, Addgene accession no. 102816) in combination with the Cre  
482 recombinase AAV2/1.CamKII0.4.Cre.SV40 (titer:  $1.8 \times 10^{13}$  GC per ml, University of Pennsylvania  
483 Vector Core accession no. AV-1-PV2396) were used. The final titer of AAV2/1-Syn-FLEX-mRuby2-  
484 CSG-P2A-GCaMP6m-WPRE-SV40 was  $1.4 \times 10^{13}$  GC per ml (PBS was used for dilution).

485

486 **Solutions** Cortex buffer for *in vivo* surgeries and imaging contained 125 mM NaCl, 5 mM KCl, 10 mM  
487 glucose, 10 mM HEPES, 2 mM  $\text{CaCl}_2$  (2 ml 1M  $\text{CaCl}_2$ ) and 2 mM  $\text{MgSO}_4$  (2 ml 1M  $\text{MgSO}_4$ ). The buffer  
488 was sterilized and maintained at pH 7.4.

489 The cutting solution for *in vitro* experiments contained 85 mM NaCl, 75 mM sucrose, 2.5 KCl, 23 mM  
490 glucose, 1.25 mM  $\text{NaH}_2\text{PO}_4$ , 4 mM  $\text{MgCl}_2$ , 0.5 mM  $\text{CaCl}_2$  and 24 mM  $\text{NaHCO}_3$ , 310-325 mOsm,  
491 bubbled with 95% (vol/vol)  $\text{O}_2$ , 5% (vol/vol)  $\text{CO}_2$ . Artificial cerebrospinal fluid (ACSF) contained 127  
492 mM NaCl, 2.5 mM KCl, 26 mM  $\text{NaHCO}_3$ , 2 mM  $\text{CaCl}_2$ , 2 mM  $\text{MgCl}_2$ , 1.25 mM  $\text{NaH}_2\text{PO}_4$  and 11 mM  
493 glucose, 305-315 mOsm, bubbled with 95% (vol/vol)  $\text{O}_2$ , 5% (vol/vol)  $\text{CO}_2$ . Caesium-based internal  
494 solution contained 122 mM  $\text{CsMeSO}_4$ , 4 mM  $\text{MgCl}_2$ , 10 mM HEPES, 4 mM Na-ATP, 0.4 mM Na-GTP,  
495 3 mM Na-L-ascorbate, 10 mM Na-phosphocreatine, 0.2 mM EGTA, 5 mM QX-314, and 0.03 mM  
496 Alexa 594, pH 7.25, 295-300 mOsm. K-based intracellular recording solution contained 126 mM K-  
497 gluconate, 4 mM KCl, 10 mM HEPES, 4 mM Mg-ATP, 0.3 mM Na-GTP, 10 mM Na-phosphocreatine,  
498 0.3-0.5% (wt/vol) Neurobiotin tracer and 0.03 mM Alexa 594, pH 7.25, 295-300 mOsm.

499

500 **Virus injection and chronic window preparation** The detailed procedure is described elsewhere  
501 (Weiler et al. 2018). Briefly, surgeries were performed on 31 female C57bl/6 mice (postnatal days  
502 P27-P35) that were intraperitoneally (i.p.) anesthetized with a mixture of Fentanyl ( $0.075 \text{ mg kg}^{-1}$ ),  
503 Midazolam ( $7.5 \text{ mg kg}^{-1}$ ) and Medetomidine ( $0.75 \text{ mg kg}^{-1}$ ). Additional drugs applied were Carprofen  
504 ( $4 \text{ mg/kg}$ , subcutaneous, s.c.) before surgery and Lidocaine (10%, topical to skin prior to incision). A  
505 section of skin over the right hemisphere starting from the dorsal scalp was removed and the  
506 underlying periosteum tissue was carefully removed. A custom machined metal head bar (oval shape,  
507 with an 8 mm opening and two screw notches) was carefully placed and angled over the binocular  
508 zone of the primary visual area. The precise location of the binocular zone was determined by intrinsic

509 optical signal (IOS) imaging through the intact skull prior to the craniotomy in each animal (see section  
510 below). A circular craniotomy (4 mm diameter) centered over the binocular zone of the right primary  
511 visual cortex was performed. The premixed virus was injected 200-500  $\mu\text{m}$  below the pial surface at  
512 a single site in the binocular zone of V1 (50-100 nl/injection,  $\sim 10$  nl/min ejected by pressure pulses  
513 at 0.2 Hz, using glass pipettes and a pressure micro injection system. Additionally, diluted fluorescent  
514 retrobeads (1:20 with cortex buffer, Lumafluor Inc.) were pressure injected (10-20 nl/injection, 5  
515 nl/min) medial and lateral to the virus injection site at  $\sim 1500$   $\mu\text{m}$  from its center. The craniotomy was  
516 covered with a glass cover slip and was sealed flush with drops of histoacryl. The head bar and cover  
517 glass were then further stabilized by dental cement. After surgery, the animal was injected s.c. with  
518 saline (500  $\mu\text{l}$ ) and the anesthesia was antagonized by i.p. injection of Naloxone ( $1.2$  mg  $\text{kg}^{-1}$ ),  
519 Flumazenil ( $0.5$  mg  $\text{kg}^{-1}$ ) and Atipamezole ( $2.5$  mg  $\text{kg}^{-1}$ ). Cells were allowed to express the virus for  
520 at least 2 weeks before *in vivo* imaging. Carprofen (4mg/kg, subcutaneous, s.c.) was administered  
521 the following two days.

522

523 **Intrinsic optical signal imaging** For IOS imaging, the optical axis was orthogonal to the head bar  
524 for each animal. The brain surface was first illuminated with light of 530 nm to visualize the blood  
525 vessel pattern and subsequently with 735 nm for intrinsic imaging in order to localize the BZ. Images  
526 were acquired using an x4 air objective (NA 0.28, Olympus) and a high-speed CCD camera (12 bit,  
527 250x348 pixel, 40 Hz). The camera was focused  $\sim 500$   $\mu\text{m}$  below the pial surface. Image acquisition  
528 and analysis software were custom written in Matlab. A patch with a size  $20^\circ \times 40^\circ$  was displayed  
529 randomly to either the left or the right mouse eye at two distinct positions next to each other in the  
530 central visual field. The patch was a sinusoidal grating displayed in eight directions for 7 s (grating  
531 orientation was changed every 0.6 s) with a temporal frequency of 2 cycles/s and a spatial frequency  
532 of 0.04 cycles/degree. A blank grey screen (50% contrast) was displayed for 5 s between each  
533 stimulus presentation. Individual trials were separated by 8 s and the entire stimulus sequence was  
534 repeated at least 2 times per eye and patch position during the surgery and at least 3 times per eye  
535 and patch position during the first *in vivo* imaging session

536

537 ***In vivo* 2-photon imaging** L2/3 PCs co-expressing GCaMP6m and a bright structural marker  
538 mRuby2 (mRuby2-CSG-P2A-GCaMP6m) were imaged *in vivo* using a tunable pulsed femtosecond  
539 Ti:Sapphire laser (Newport Spectra-Physics). The 2-photon laser was tuned to  $\lambda=940$  nm in order to  
540 simultaneously excite GCaMP6m and mRuby2. An x16 0.8 NA water immersion objective was used  
541 to detect red and green signals. The excitation light was short passed filtered (720/25 short-pass) and  
542 the emitted photons passed through a primary beam splitter (FF560 dichroic) and green and red band  
543 pass filters onto GaAsP photomultiplier tubes.

544 Multiple imaging planes were acquired by rapidly moving the objective in the z-axis using a high-load  
545 piezo z-scanner. The image volume for functional cellular imaging was  $250 \times 250 \times 100$   $\mu\text{m}^3$  with 4

546 inclined image planes that were each separated by 25  $\mu\text{m}$  in depth. Imaging frames of 512 x 512  
547 pixels (pixel size 0.49  $\mu\text{m}$ ) were acquired at 30 Hz by bidirectional scanning of an 8 kHz resonant  
548 scanner while beam turnarounds were blanked with an electro-optic modulator (Pockels cell). Imaging  
549 was performed between 130-400  $\mu\text{m}$  below the pial surface. Excitation power was scaled  
550 exponentially (exponential length constant  $\sim 150 \mu\text{m}$ ) with depth to compensate for light scattering in  
551 tissue with increasing imaging depth. The average power for imaging was  $<50 \text{ mW}$ , measured after  
552 the objective. The optical axis was adjusted orthogonal to the cranial window. ScanImage 4.2  
553 (Pologruto, Sabatini, and Svoboda 2003) and custom written hardware drivers were used to control  
554 the 2PLSM microscope.

555 After functional characterization of L2/3 PCs, at least two high-resolution structural image stacks with  
556 different field of view sizes (low and high) were acquired at  $\lambda=940 \text{ nm}/1040 \text{ nm}$ . These stacks were  
557 acquired from the pial surface to L5/L6 and contained the functionally characterized L2/3 pyramidal  
558 cells of interest. These structural stacks usually consisted of 1) 450 sections (512 x 512 pixels) with  
559 a pixel size of 0.5  $\mu\text{m}$  collected in z-steps of 1.4  $\mu\text{m}$  (resulting in an imaged volume of 256 x 256 x  
560 630  $\mu\text{m}^3$ ). 2) 350 sections (512 x 512 pixels) with a pixel size of 1.9  $\mu\text{m}$  collected in z-steps of 2  $\mu\text{m}$   
561 (resulting in an imaged volume of 972 x 972 x 700  $\mu\text{m}^3$ ).

562 Experiments were performed under light anesthesia. Data acquisition started  $\sim 45 \text{ min}$  after mice were  
563 injected with an i.p. injection of Fentanyl ( $0.035 \text{ mg kg}^{-1}$ ), Midazolam ( $3.5 \text{ mg kg}^{-1}$ ) and Medetomidine  
564 ( $0.35 \text{ mg kg}^{-1}$ ). Additional anesthetics (25% of induction level) were subcutaneously injected every  
565 45-60 mins to maintain the level of anesthesia. Ophthalmic ointment was applied to protect the eyes.  
566 Mice were fixed under the microscope by screwing the metal head-plate to two posts and stable  
567 thermal homeostasis was guaranteed by using a heated blanket throughout the imaging session. Eye  
568 and pupil positions were recorded with two cameras throughout imaging.

569

570 **Visual stimulation** Visual stimuli were generated using the MATLAB Psychophysics Toolbox  
571 extension and displayed on a gamma-corrected LCD monitor (<http://psychtoolbox.org>). The screen  
572 measured 24.9 x 44.3 cm, had a refresh rate of 60 Hz and was positioned in portrait 13 cm in front of  
573 the eyes of the mouse. The monitor was adjusted in position (rotation and tilt) for each mouse to cover  
574 the binocular visual field. The presented stimuli area was chosen to subtend binocular visual space  
575 and the rest of the screen was uniformly grey (50% contrast). An OpenGL shader was applied to  
576 correct for the increasing eccentricity on a flat screen relative to the spherical mouse space (Marshall  
577 et al. 2011). Monocular stimulation of the eyes was achieved by servo-motor driven eye shutters that  
578 were operated by a microcontroller (see: <http://csflab.nin.knaw.nl/protocols/eyeshutters>) and  
579 MATLAB.

580 For all visual stimuli presented, the backlight of the LED screen was synchronized to the resonant  
581 scanner to turn on only during the bidirectional scan turnaround periods when imaging data were not

582 recorded (Leinweber et al. 2014). The mean luminance with 16 kHz pulsed backlight was 0.01 cd/m<sup>2</sup>  
583 for black and 4.1 cd/m<sup>2</sup> for white.

584 To measure ocular dominance, the right or left eye was visually stimulated in random order using  
585 sinusoidal gratings of eight directions with a temporal frequency of 3 cycles/s and a spatial frequency  
586 of 0.04 cycles/degree. In order to cover the binocular visual space, the visual stimuli were presented  
587 at -25° to 25° azimuth and -15° to 35° elevation relative to the midline. Stimulation duration for moving  
588 gratings was 5 s interleaved by 6 s of a full-field grey screen. Trials were repeated 4 times per eye  
589 and direction.

590 Spontaneous activity was measured during 10 min in complete darkness with the monitor being turned  
591 off and eye shutters removed.

592

593 **Acute brain slice preparation and reidentification of cells** The detailed procedure is described  
594 elsewhere (Weiler et al. 2018b). Briefly, naïve mice (4-8 weeks old) and mice 1-2 days after *in vivo*  
595 imaging were deeply anesthetized with Isoflurane in a sealed container (>100 mg/kg) and rapidly  
596 decapitated. Coronal sections of V1 (320 µm, Bregma -1.5 to -3) were cut in ice cold carbogenated  
597 cutting solution using a vibratome (VT1200S, Leica). Slices were incubated in cutting solution in a  
598 submerged chamber at 34°C for at least 45 min and then transferred to ACSF in a light-shielded  
599 submerged chamber at room temperature (21°C) until used for recordings. Brain slices were used for  
600 up to 6 hours. A single brain slice was mounted on a *poly-D-lysine coated* coverslip and then  
601 transferred to the recording chamber of the *in vitro* 2PLSM while keeping track of the rostro-caudal  
602 orientation of the slice. For *in vivo* / *in vitro* experiments, the fluorescence bead deposits in the brain  
603 slice where used to locate the area of interest by comparing the recorded distance between beads  
604 and imaging area to the ones obtained *in vivo*. Following this, a high-resolution image stack was  
605 acquired from the slice surface to the bottom using an x16 objective and a wavelength of 1040 nm to  
606 excite mRuby2. ScanImage 4.2 and custom written hardware drivers were used to operate the *in vitro*  
607 2PLSM microscope. The *in vitro* stack consisted of 200-320 sections (512 x 512 pixels; 0.5 -2 µm per  
608 pixel) recorded in z steps of 1-2 µm. As a next step, the relative positions of cells and morphological  
609 details such as blood vessel patterns were compared between the side view of the *in vivo* stack and  
610 the face view of the *in vitro* stack. Z-projections of sections of the *in vivo* side view and *in vitro* stacks  
611 were created (50 sections with 1 µm spacing using Image J) and used to compare and match cell  
612 patterns in z-projections by eye.

613

614 **Photostimulation** For uncaging experiments using UV laser light two different setups were used.  
615 Coronal brain slices were visualized with an upright microscope (setup 1: BW51X, Olympus, setup 2:  
616 A-scope, Thorlabs) using infrared Dodt gradient contrast (DGC) with a low magnification UV  
617 transmissive objective (4x objective lens) and images were acquired by a high-resolution digital CCD  
618 camera. The digitized images from the camera were used for registering photostimulation sites in

619 cortical brain sections. MNI-caged-L-glutamate concentration was 0.2 mM. The bath solution was  
620 replaced after 3 h of recording, and bath evaporation was counterbalanced by adding a constant small  
621 amount of distilled H<sub>2</sub>O to the solution reservoir using a perfusor. For *in vitro* experiments without  
622 previous cell characterization *in vivo*, L2/3 PCs in bV1 were primarily targeted using morphological  
623 landmarks and then whole cell recordings were performed at high magnification using a 60x objective.  
624 Targeted PC bodies were at least 50 μm below the slice surface. For the *in vivo* / *in vitro* experiments,  
625 2-photon guided targeted patching was performed on cells that were matched *in vivo* and *in vitro*.  
626 Borosilicate glass patch pipettes (resistance of 4-5 MΩ) were filled with a Cs-based internal solution  
627 for measuring excitatory and inhibitory postsynaptic currents (EPSC: voltage clamped at -70 mV,  
628 IPSC: voltage clamped at 0-5 mV). Electrodes also contained 30 μM Alexa 594 for detailed  
629 morphological visualization using 2-photon microscopy. Once stable whole-cell recordings were  
630 obtained with good access resistance (< 30 MΩ) the microscope objective was switched from 60x to  
631 4x. For circuit mapping, the slice was positioned within the CCD camera's field of view and a stimulus  
632 grid (16 x 16 with 69 μm spacing) was aligned to the pial surface using Ephus software (Suter et al.  
633 2010). The location of the cell soma was noted in Ephus. The UV laser power was adjusted to 10-15  
634 mW in the specimen plane and then the mapping was initiated (1 ms pulses, 1s interstimulus interval).  
635 Multiple maps were recorded in a pseudo-random fashion while clamping the cell at -70 mV (2-3  
636 repetitions with change of mapping sequence during each trial). Optionally, multiple (2-3 repetitions)  
637 inhibitory laminar input maps were recorded at 0 mV.

638 On setup A (SA), a diode pumped solid state (DPSS laser Inc.) laser was used to generate 355 nm  
639 UV laser pulses for glutamate uncaging. The duration and intensity of the laser pulses were controlled  
640 by an electro-optical modulator, a neutral density filter wheel and a mechanical shutter. The beam of  
641 light was controlled using voltage-controlled mirror galvanometers. An UV-sensitive photodiode  
642 measured the power of the UV laser beam. A dichroic mirror reflected the UV beam into the optical  
643 axis of the microscope while transmitting visible light for capturing bright-field images by the CCD  
644 camera. The beam passed a tube/scan lens pair in order to underfill the back aperture of the x4  
645 mapping objective resulting in a pencil-shaped beam.

646 On setup B (SB), the UV laser for glutamate uncaging was an Explorer One 355-1 (Newport Spectra-  
647 Physics). The duration and intensity of the laser pulses were directly controlled using analog signals  
648 and the built-in software L-Win and a mechanical shutter as well as neutral density filters. An UV-  
649 sensitive photodiode measured the power of the UV laser beam.

650 Data were acquired with Multiclamp 700 B amplifiers (Axon instruments). Voltage clamp recordings  
651 were filtered at 4-8 khz and digitized at 10 kHz. Data Analysis was performed using custom-written  
652 software in MATLAB. The spatial resolution of photostimulation was estimated using excitation  
653 profiles (Shepherd and Svoboda 2005). Excitation profiles describe the spatial resolution of uncaging  
654 sites that generate action potentials in stimulated neurons. For this, excitatory as well as inhibitory  
655 cells in different layers of V1 were recorded either in whole-cell or cell-attached configuration using

656 the K-based internal solution with the amplifier in current-clamp mode. The microscope objective was  
657 then switched from 60x to 4x and a 8x8 or 8x16 stimulus grid with 50 or 69  $\mu\text{m}$  spacing was overlaid  
658 on the slice image and the soma location was registered. The interstimulus interval was set to 1 s and  
659 a map was acquired.

660

661 **Image acquisition for morphological imaging** The patch pipette was carefully retracted from the  
662 cell after successful recording and filling with Alexa-594. A detailed structural 2-photon image stack  
663 of the dendritic morphology of the entire cell was acquired with excitation light of  $\lambda=810$  nm using  
664 ScanImage 4.2 (Pologruto, Sabatini, and Svoboda 2003). The structural image stacks typically  
665 consisted of 250 sections (1024 x 1024 pixels; 0.3-0.8  $\mu\text{m}$  per pixel) collected in z steps of 1-2  $\mu\text{m}$ .  
666 For cells that contained mRuby2 as structural marker, a second identical image stack was acquired  
667 at  $\lambda=940/1040$  nm. An overlay of the acquired stacks (in ImageJ) was then used to verify that the *in*  
668 *vivo* functionally characterized cell of interest was successfully re-identified, recorded and filled with  
669 Alexa 594.

670

671 ***In vivo* imaging analysis** Custom-written Matlab software was used for image and data analysis.  
672 For optical signal imaging analysis, the acquired images were high-pass filtered and clipped (1.5%)  
673 to calculate blank-corrected image averages for each condition. Additionally, a threshold criterion  
674 (image background mean + 4 x standard deviation) was set to determine the responsive region within  
675 the averaged image. The mean background value of the non-responsive region was subtracted from  
676 each pixel and all pixel values within the responsive area were summed to obtain an integrated  
677 measure of response strength.

678 The use of GCaMP6m in combination with mRuby2 gave the possibility to perform ratiometric imaging.  
679 Image sequences were full-frame corrected for tangential drift and small movements caused by heart  
680 beat and breathing. An average of 160 image frames acquired without laser excitation was subtracted  
681 from all frames of the individual recording to correct for PMT dark current as well as residual light from  
682 the stimulus screen. Cell body detection was based on the average morphological image derived from  
683 the structural channel (mRuby2) for each recording session. ROIs (Region of interest) were drawn  
684 manually, annotated and re-identified in subsequent imaging sessions. The fluorescence time course  
685 of the area within the cell body was calculated by averaging all pixel values with the ROI on both  
686 background-corrected channels. Cell calcium traces were then low-pass filtered (0.8 Hz cut-off) and  
687 the neuropil signal subtracted using a neuropil factor  $r$  of 0.7(Kerlin et al. 2010). The green and red  
688 fluorescence signal were estimated as:

689

$$690 \quad F_{green_{cell}}(t) = F_{green_{cell\_measured}}(t) - r \times F_{green_{neuropil}}(t) + r \times \text{median}(F_{green_{neuropil}}(t))$$

691

$$692 \quad F_{red_{cell}}(t) = F_{red_{cell\_measured}}(t) - r \times F_{red_{neuropil}}(t) + r \times \text{median}(F_{red_{neuropil}}(t))$$

693

694



695 The ratio  $R(t)$  was then calculated as:

$$696 \quad R(t) = \frac{F_{green_{cell}}(t)}{F_{red_{cell}}(t)}$$

697  
698

699 Slow timescale changes were removed by subtracting the 8<sup>th</sup> percentile of a moving 14 s temporal  
700 window from  $R(t)$ .  $\Delta R/R_0$  was calculated as:

701

$$702 \quad \Delta R/R_0 = \frac{R - R_0}{R_0}$$

703

704 where  $R_0$  was measured over a 1 s period before the visual stimulation as the median of the individual  
705 mean baseline ratio signal of each trial. Visual responses were then extracted from trial-averaged  
706 responses as mean fluorescence ratio change over the full stimulus interval.

707 To determine visual responsiveness, a one-way ANOVA was performed over all averaged stimulation  
708 trials per orientation as well as  $R_0$  periods for each eye in the case of monocular stimulation. For  
709 binocular stimulation, a one-way ANOVA was performed over all averaged stimulation trials per  
710 condition as well as  $R_0$  periods. In both cases, neurons with  $p$ -values  $< 0.05$  were identified as visually  
711 responsive.

712 Orientation-tuned cells were defined as neurons that showed a significant difference in  
713 responsiveness ( $p < 0.01$ , one-way ANOVA) over all presented grating directions in the ipsilateral,  
714 the contralateral or both eyes. The calculation of stimulus selectivity was performed on eye-specific  
715 responses that were significant in 50 % of the trials of at least one stimulus direction of a single eye  
716 exposure.

717 OD was determined by the OD index (ODI) for each individual cell:

718

$$719 \quad ODI = \frac{\frac{\Delta R}{R_0} \text{contra}_{pref\_dir} - \frac{\Delta R}{R_0} \text{ipsi}_{pref\_dir}}{\frac{\Delta R}{R_0} \text{contra}_{pref\_dir} + \frac{\Delta R}{R_0} \text{ipsi}_{pref\_dir}}$$

720

721 Where an ODI value of 1 or -1 displays exclusive contra- and ipsilateral dominance, respectively.

722 Global orientation selectivity index (gOSI) was computed as  $1 - \text{circular Variance (circ. Var.)}$ :

723

$$724 \quad gOSI = 1 - \text{circ. var.} = \left| \frac{\sum R(\theta_k) e^{2i\theta_k}}{\sum R(\theta_k)} \right|$$

725

726 and global direction selectivity index (gDSI) was computed as:

727

$$728 \quad gDSI = 1 - \text{dir. circ. var.} = \left| \frac{\sum R(\theta_k) e^{i\theta_k}}{\sum R(\theta_k)} \right|$$

729

730

731  $R(\theta_k)$  is here the mean response to the direction angle ( $\theta_k$ ). Perfect orientation/direction selectivity is  
732 indicated with gOSI/gDSI of 1, whereas a gOSI/gDSI value of 0 indicates no orientation or direction  
733 selectivity. The preferred orientation and direction were computed by fitting a double-Gaussian tuning  
734 curve to the data. For binocular cells, the preferred orientation was defined as that one from the  
735 dominant eye, as determined by the sign of the ODI.

736 To determine spontaneous activity events in the dark, the baseline ( $R_0$ ) was calculated by taking the  
737 8<sup>th</sup> percentile of a 20 s moving window across the entire spontaneous activity period, and averaging  
738 these values. Then this  $R_0$  was used in the same way as the one described above for the visual  
739 stimulation protocols to yield  $\Delta R/R_0$ . Calcium event detection was performed by first taking the  
740 derivative of the low passed calcium trace (cut-off at 5 Hz). An event onset was defined as any point  
741 where the z-scored trace crossed a value of 2.

742 Population coupling was estimated by the correlation of a cell's  $\Delta R/R_0$  trace to the average  $\Delta R/R_0$   
743 trace of the rest of the population within the same recording. The population values were z-scored  
744 within each recording to compare data across multiple experiments. Finally, noise correlations were  
745 calculated by first computing the Pearson pairwise correlation matrix of aligned single trial responses  
746 between cells. Then, for each cell, the vector of its correlation values was taken with every other cell  
747 and averaged (excluding the target cell). Since the eyes were stimulated separately, for each cell only  
748 the average coming from its preferred eye stimulation sequence was considered. There were no  
749 differences when taking the average of the correlations versus when taking the noise correlations for  
750 the preferred direction stimulus (data not shown).

751

752 **Photostimulation analysis** The spatial resolution of LSPS by UV glutamate uncaging was calculated  
753 based on the size of the excitation profiles as the mean weighted distance from the soma ( $d_{soma}$ ) of  
754 AP generating sites using the following equation:

755

$$756 \quad R = \frac{\sum APs \times d_{soma}}{\sum APs}$$

757

758 LSPS by UV glutamate uncaging induces two types of responses: 1) direct glutamate uncaging  
759 responses originating from direct activation of the glutamate receptors of the recorded neuron. 2)  
760 synaptically mediated responses originating from the activation of presynaptic neurons  
761 (Supplementary Fig. 2). Responses to the LSPS stimulation protocol (both for EPSCs and IPSCs)  
762 were quantified in the 150 ms window following the uncaging light-pulse, since this is the time window  
763 where evoked activity is normally observed. Considering the diversity of responses encountered in  
764 these experiments, a heuristic analysis scheme was devised to address the main observed cases:

765 1) Inactive traces were excluded by only considering those responses with a deflection higher than  
766 2 S.D. over the baseline at any point. Additionally, traces that only had a significant response in one  
767 (out of x) repetition were also excluded.

768 2) Then, purely synaptic responses, i.e. those that correspond only to activation of the presynaptic  
769 terminal via uncaged glutamate - the ones of interest in this study - were selected by taking the traces  
770 that passed the 2 S.D. threshold only after a 7 ms window from the offset of stimulation.

771 3) For responses that did not pass the previous criterion, inspection by eye indicated that several of  
772 them presented all the identifiable features of purely synaptic responses but seemed to cross the  
773 threshold slightly earlier than 7 ms. An additional set of experiments performed on a subset of cells,  
774 where maps were measured before and after application of TTX (and hence before and after only  
775 direct responses were present) were added to measure the effect of considering these intermediated  
776 cases (~5% of the total number of traces). These experiments showed that by using a secondary  
777 window of 3.5 ms, the error incurred in including these intermediate traces is ~20 % (data not shown).  
778 Therefore, this secondary window was used to include a second batch of traces into the synaptic  
779 response pool.

780 4) Finally, those traces that did not pass the secondary window were then blanked, and a 4-  
781 dimensional interpolation method (via the MATLAB function "griddatan") was used to infer their  
782 temporal profiles based on their 8 neighboring pixel activities in space and time. In the aforementioned  
783 TTX experiments (data not shown) every position with a response was observed to have a synaptic  
784 component, but the addition of this synaptic component and the overlapping direct component is non-  
785 linear. Therefore, this interpolation method was used to extract the synaptic component partially  
786 masked in the raw traces by the direct response. The approach relies on the observation that the  
787 synaptic responses of neighboring positions are similar across time, therefore indicating that  
788 information on the synaptic responses masked by direct responses is contained in the responses  
789 surrounding them. These interpolated responses were then incorporated into the maps as synaptic  
790 responses, and used in all subsequent calculations and figures. For excitatory input maps, the first  
791 two stimulation rows were excluded since excitatory input from L1 originated from cells in L2/3-L5  
792 having apical tuft dendrites in L1, which fired action potentials when their tufts were stimulated in L1  
793 (see Supplementary Fig. 3).

794

795 **Centroid calculation** To calculate the weighted centroid for each map, the layers of interest (2/3, 4  
796 or 5) were separated, the weighted centroid was calculated according to the following formula and  
797 then the centroid coordinates were translated from image coordinates to input map coordinates.

798

$$799 \text{ (Centroid } x, \text{Centroid } y) = \left( \frac{\sum x \times w}{\sum w}, \frac{\sum y \times w}{\sum w} \right)$$

800

801

802 Here  $x$  and  $y$  are the horizontal and vertical coordinates of every pixel, and  $w$  is the value associated  
803 with that position. Then, all coordinates were translated to their anatomical location for further use  
804 and comparison with other cells. The distance between the cell soma and the centroid was utilized in  
805 most of the analyses.

806

807 **Input Map Principal Component Analysis (PCA)** Since the goal was to assess the main sources of  
808 variance driving the shape of the input distributions, before PCA the input maps were aligned based  
809 on the soma position of each cell. This involved shifting the maps vertically an integer number of  
810 stimulus rows until all the somata were in the same row. Then, all maps were internally normalized  
811 and used as features for PCA. The first 3 Principal Components for each input map were extracted  
812 (carrying roughly 60% of the variance in the dataset). PCA was performed separately for excitation  
813 and inhibition maps to keep their independence unbound. As a control, the combined excitation-  
814 inhibition PCA decomposition was calculated. For this, the feature vectors from excitation and  
815 inhibition for each map were concatenated, yielding a 512 element feature vector that was then used  
816 for the decomposition in the same way as described above.

817

818 **UMAP embedding** Uniform Manifold Approximation and Projection was utilized to visualize the  
819 distribution of different properties across the data on a cell by cell basis. The computational details of  
820 UMAP are described elsewhere (McInnes, Healy, and Melville 2018). Briefly, UMAP embeds data  
821 points from a high dimensional space into a 2D space preserving their high dimensional distances in  
822 a neighborhood. This permits effective visualization of the connections between data points. A UMAP  
823 implementation in Matlab developed by Meehan, Meehan and Moore  
824 (<https://www.mathworks.com/matlabcentral/fileexchange/71902>) was utilized. The excitatory input  
825 fraction from L4, the  $x$  and  $y$  coordinates of the inhibitory L2/3 input map centroid and the pial depth  
826 of the cell were used as the embedding parameters. 15 was used as the number of neighbors and  
827 0.1 as the minimum distance (default parameters). The embedded points were color-coded depending  
828 on the property, either in a normalized scale or in a periodic scale when visualizing angles.

829 **Morphological reconstruction and analysis** The reconstruction of dendritic cell morphology was  
830 performed manually using the Simple Neurite Tracer of ImageJ. Reconstructions were quantitatively  
831 analyzed in MATLAB and with the open-source TREES toolbox (Cuntz et al. 2011). For Sholl analysis,  
832 the number of intersections between dendrites and concentric spheres centered on the soma was  
833 determined at increasing distances from soma (20  $\mu\text{m}$  increments).

834 **Statistics** Data are reported as mean  $\pm$  standard error of the mean (SEM). Correlation coefficients  
835 were calculated as Pearson's correlation coefficient. The Circular Statistics Toolbox developed by  
836 Philipp Berens was utilized for circular correlation calculation

837 ([https://www.mathworks.com/matlabcentral/fileexchange/10676-circular-statistics-toolbox-](https://www.mathworks.com/matlabcentral/fileexchange/10676-circular-statistics-toolbox-directional-statistics)  
838 [directional-statistics](https://www.mathworks.com/matlabcentral/fileexchange/10676-circular-statistics-toolbox-directional-statistics)).

839 Before comparison of data, individual data sets were checked for normality using the Kolmogorov-  
840 Smirnov Goodness-of-Fit test. None of the data sets considered in this study was found to be normally  
841 distributed. Therefore, paired or unpaired nonparametric statistics (Wilcoxon rank sum test, signed-  
842 rank or Kruskal-Wallis test on ranks with Bonferroni's post hoc test for multiple comparison) were  
843 used for comparison. Two-tailed tests were used unless otherwise stated. Asterisks indicate  
844 significance values as follows: \* $p < 0.05$ , \*\*  $p < 0.01$ , \*\*\*  $p < 0.001$ .

845

846 **Conflict of interest statement**

847 The authors declare no competing interests.

848

849 **Acknowledgements**

850 We are grateful to Volker Staiger for cell tracing as well as technical support and to Michael Myoga  
851 for helping to build the *in vitro* setup. This study was supported by the Max Planck Society and the  
852 Deutsche Forschungsgemeinschaft (CRC 870; V.S., T.B., T.R., and M.H.).

853

854 **Author Contribution**

855 S.W. and V.S. conceived the project, with input from M.H. and T.R.. S.W. planned and performed all  
856 experiments. D.G.N., T.R. and S.W. wrote the advanced analysis tools and D.G.N., S.W. and V.S.  
857 analyzed the data. S.W. and V.S. implemented LSPS at the patch-clamp setups. T.R. designed and  
858 built the *in vivo* 2-photon setup and developed the viral construct. S.W., D.G.N, and V.S. wrote the  
859 paper. T.R., M.H. and T.B. edited the paper. T.B. provided research environment.

860

861 **Affiliations**

862 Max Planck Institute of Neurobiology, München-Martinsried, Germany: Drago Guggiana Nilo, Mark  
863 Hübener, Tobias Bonhoeffer

864 Sainsbury Wellcome Centre for Neural Circuits and Behaviour, University College London, London,  
865 UK: Simon Weiler

866 Institute for Experimental Epileptology and Cognition Research (IEECR), University Bonn, Germany:  
867 Tobias Rose

868 Department of Psychiatry, Ludwig-Maximilians-University München, München-Martinsried,  
869 Germany: Volker Scheuss

870

871 **Corresponding author**

872 Correspondence to Volker Scheuss.

873

874 **References**

875

876

877 Alonso, J. M., and R. C Reid. 1995. "Specificity of Monosynaptic Connections from Thalamus to  
878 Visual Cortex." *Nature* 378 (November): 16.

879 Binzegger, Tom, Rodney J Douglas, and Kevan A C Martin. 2007. "Behavioral/Systems/Cognitive  
880 Stereotypical Bouton Clustering of Individual Neurons in Cat Primary Visual Cortex."

881 <https://doi.org/10.1523/JNEUROSCI.3753-07.2007>.

882 Bosking, William H., Ying Zhang, Brett Schofield, and David Fitzpatrick. 1997. "Orientation  
883 Selectivity and the Arrangement of Horizontal Connections in Tree Shrew Striate Cortex."

884 *Journal of Neuroscience* 17 (6): 2112–27. <https://doi.org/10.1523/jneurosci.17-06-02112.1997>.

885 Callaway, E. M., and L. C. Katz. 1993. "Photostimulation Using Caged Glutamate Reveals  
886 Functional Circuitry in Living Brain Slices." *Proceedings of the National Academy of Sciences*

887 *of the United States of America*. <https://doi.org/10.1073/pnas.90.16.7661>.

888 Chapman, B., K. R. Zahs, and M. P. Stryker. 1991. "Relation of Cortical Cell Orientation Selectivity  
889 to Alignment of Receptive Fields of the Geniculocortical Afferents That Arborize within a Single  
890 Orientation Column in Ferret Visual Cortex." *Journal of Neuroscience* 11 (5): 1347–58.

891 <https://doi.org/10.1523/jneurosci.11-05-01347.1991>.

892 Chen, Tsai Wen, Trevor J. Wardill, Yi Sun, Stefan R. Pulver, Sabine L. Renninger, Amy Baohan,  
893 Eric R. Schreiter, et al. 2013. "Ultrasensitive Fluorescent Proteins for Imaging Neuronal

894 Activity." *Nature* 499 (7458): 295–300. <https://doi.org/10.1038/nature12354>.

895 Chiu, Chiayu Q., Gyorgy Lur, Thomas M. Morse, Nicholas T. Carnevale, Graham C.R. Ellis-Davies,  
896 and Michael J. Higley. 2013. "Compartmentalization of GABAergic Inhibition by Dendritic

897 Spines." *Science* 340 (6133): 759–62. <https://doi.org/10.1126/science.1234274>.

898 Cossell, Lee, Maria Florencia Iacaruso, Dylan R. Muir, Rachael Houlton, Elie N. Sader, Ho Ko,  
899 Sonja B. Hofer, and Thomas D. Mrsic-Flogel. 2015. "Functional Organization of Excitatory

900 Synaptic Strength in Primary Visual Cortex." *Nature* 518 (7539): 399–403.

901 <https://doi.org/10.1038/nature14182>.

902 Cruz-Martín, Alberto, Rana N. El-Danaf, Fumitaka Osakada, Balaji Sriram, Onkar S. Dhande, Phong  
903 L. Nguyen, Edward M. Callaway, Anirvan Ghosh, and Andrew D. Huberman. 2014. "A

904 Dedicated Circuit Links Direction-Selective Retinal Ganglion Cells to the Primary Visual  
905 Cortex." *Nature* 507 (7492): 358–61. <https://doi.org/10.1038/nature12989>.

906 Cuntz, Hermann, Friedrich Forstner, Alexander Borst, and Michael Häusser. 2011. "The TREES  
907 Toolbox-Probing the Basis of Axonal and Dendritic Branching." *Neuroinformatics* 9 (1): 91–96.

908 <https://doi.org/10.1007/s12021-010-9093-7>.

909 Douglas, Rodney J., and Kevan A.C. Martin. 2004. "NEURONAL CIRCUITS OF THE  
910 NEOCORTEX." *Annual Review of Neuroscience*.

911 <https://doi.org/10.1146/annurev.neuro.27.070203.144152>.

- 912 Dräger, Ursula C. 1975. "Receptive Fields of Single Cells and Topography in Mouse Visual Cortex."  
913 *Journal of Comparative Neurology* 160 (3): 269–89. <https://doi.org/10.1002/cne.901600302>.
- 914 Feldmeyer, Dirk, Joachim Lübke, and Bert Sakmann. 2006. "Efficacy and Connectivity of  
915 Intracolumnar Pairs of Layer 2/3 Pyramidal Cells in the Barrel Cortex of Juvenile Rats." *Journal*  
916 *of Physiology* 575 (2): 583–602. <https://doi.org/10.1113/jphysiol.2006.105106>.
- 917 Garrett, Marina E., Ian Nauhaus, James H. Marshel, Edward M. Callaway, Marina E. Garrett, James  
918 H. Marshel, Ian Nauhaus, and Marina E. Garrett. 2014. "Topography and Areal Organization of  
919 Mouse Visual Cortex." *Journal of Neuroscience* 34 (37): 12587–600.  
920 <https://doi.org/10.1523/JNEUROSCI.1124-14.2014>.
- 921 Gouwens, Nathan W., Staci A. Sorensen, Jim Berg, Changkyu Lee, Tim Jarsky, Jonathan Ting,  
922 Susan M. Sunkin, et al. 2019. "Classification of Electrophysiological and Morphological Neuron  
923 Types in the Mouse Visual Cortex." *Nature Neuroscience* 22 (7): 1182–95.  
924 <https://doi.org/10.1038/s41593-019-0417-0>.
- 925 Harris, Kenneth D., and Thomas D. Mrsic-Flogel. 2013. "Cortical Connectivity and Sensory Coding."  
926 *Nature*. <https://doi.org/10.1038/nature12654>.
- 927 Harris, Kenneth D., and Gordon M.G. Shepherd. 2015. "The Neocortical Circuit: Themes and  
928 Variations." *Nature Neuroscience* 18 (2): 170–81. <https://doi.org/10.1038/nn.3917>.
- 929 Hubel, D. H., and T. N. Wiesel. 1962. "Receptive Fields, Binocular Interaction and Functional  
930 Architecture in the Cat's Visual Cortex." *The Journal of Physiology*.  
931 <https://doi.org/10.1113/jphysiol.1962.sp006837>.
- 932 Iacaruso, M. Florencia, Ioana T. Gasler, and Sonja B. Hofer. 2017. "Synaptic Organization of Visual  
933 Space in Primary Visual Cortex." *Nature* 547 (7664): 449–52.  
934 <https://doi.org/10.1038/nature23019>.
- 935 Kerlin, Aaron M., Mark L. Andermann, Vladimir K. Berezovskii, and R. Clay Reid. 2010. "Broadly  
936 Tuned Response Properties of Diverse Inhibitory Neuron Subtypes in Mouse Visual Cortex."  
937 *Neuron* 67 (5): 858–71. <https://doi.org/10.1016/j.neuron.2010.08.002>.
- 938 Kim, Euseok J., Ashley L. Juavinett, Espoir M. Kyubwa, Matthew W. Jacobs, and Edward M.  
939 Callaway. 2015. "Three Types of Cortical Layer 5 Neurons That Differ in Brain-Wide  
940 Connectivity and Function." *Neuron*. <https://doi.org/10.1016/j.neuron.2015.11.002>.
- 941 Ko, Ho, Sonja B. Hofer, Bruno Pichler, Katherine A. Buchanan, P. Jesper Sjöström, and Thomas D.  
942 Mrsic-Flogel. 2011. "Functional Specificity of Local Synaptic Connections in Neocortical  
943 Networks." *Nature* 473 (7345): 87–91. <https://doi.org/10.1038/nature09880>.
- 944 Kreile, Anne K., Tobias Bonhoeffer, and Mark Hübener. 2011. "Altered Visual Experience Induces  
945 Instructive Changes of Orientation Preference in Mouse Visual Cortex." *Journal of*  
946 *Neuroscience* 31 (39): 13911–20. <https://doi.org/10.1523/JNEUROSCI.2143-11.2011>.
- 947 Lee, Wei Chung Allen, Vincent Bonin, Michael Reed, Brett J. Graham, Greg Hood, Katie Glattfelder,  
948 and R. Clay Reid. 2016. "Anatomy and Function of an Excitatory Network in the Visual Cortex."



- 949 *Nature* 532 (7599): 370–74. <https://doi.org/10.1038/nature17192>.
- 950 Leinweber, Marcus, Pawel Zmarz, Peter Buchmann, Paul Argast, Mark Hübener, Tobias  
951 Bonhoeffer, and Georg B. Keller. 2014. “Two-Photon Calcium Imaging in Mice Navigating a  
952 Virtual Reality Environment.” *Journal of Visualized Experiments*, no. 84 (February): e50885.  
953 <https://doi.org/10.3791/50885>.
- 954 Lien, Anthony D., and Massimo Scanziani. 2013. “Tuned Thalamic Excitation Is Amplified by Visual  
955 Cortical Circuits.” *Nature Neuroscience*. <https://doi.org/10.1038/nn.3488>.
- 956 Liu, Bao hua, Ya tang Li, Wen pei Ma, Chen jie Pan, Li I. Zhang, and Huizhong Whit Tao. 2011.  
957 “Broad Inhibition Sharpens Orientation Selectivity by Expanding Input Dynamic Range in  
958 Mouse Simple Cells.” *Neuron* 71 (3): 542–54. <https://doi.org/10.1016/j.neuron.2011.06.017>.
- 959 Marshel, James H., Marina E. Garrett, Ian Nauhaus, and Edward M. Callaway. 2011. “Functional  
960 Specialization of Seven Mouse Visual Cortical Areas.” *Neuron* 72 (6): 1040–54.  
961 <https://doi.org/10.1016/j.neuron.2011.12.004>.
- 962 McInnes, Leland, John Healy, and James Melville. 2018. “UMAP: Uniform Manifold Approximation  
963 and Projection for Dimension Reduction.” <http://arxiv.org/abs/1802.03426>.
- 964 Meng, Xiangying, Daniel E Winkowski, Joseph P Y Kao, and Patrick O Kanold. 2017. “Sublaminar  
965 Subdivision of Mouse Auditory Cortex Layer 2/3 Based on Functional Translaminar  
966 Connections.” *The Journal of Neuroscience : The Official Journal of the Society for  
967 Neuroscience* 37 (42): 10200–214. <https://doi.org/10.1523/JNEUROSCI.1361-17.2017>.
- 968 Morgenstern, Nicolás A, Jacques Bourg, and Leopoldo Petreanu. 2016. “Multilaminar Networks of  
969 Cortical Neurons Integrate Common Inputs from Sensory Thalamus.” *Nature Neuroscience* 19  
970 (8): 1034–40. <https://doi.org/10.1038/nn.4339>.
- 971 Nassi, Jonathan J., Stephen G. Lomber, and Richard T. Born. 2013. “Corticocortical Feedback  
972 Contributes to Surround Suppression in V1 of the Alert Primate.” *Journal of Neuroscience* 33  
973 (19): 8504–17. <https://doi.org/10.1523/JNEUROSCI.5124-12.2013>.
- 974 Pologruto, Thomas A., Bernardo L. Sabatini, and Karel Svoboda. 2003. “ScanImage: Flexible  
975 Software for Operating Laser Scanning Microscopes.” *BioMedical Engineering Online* 2 (1): 13.  
976 <https://doi.org/10.1186/1475-925X-2-13>.
- 977 Rossi, Luigi Federico, Kenneth Harris, and Matteo Carandini. 2019. “Excitatory and Inhibitory  
978 Intracortical Circuits for Orientation and Direction Selectivity.” *BioRxiv*, February, 556795.  
979 <https://doi.org/10.1101/556795>.
- 980 Roth, Morgane M., Johannes C. Dahmen, Dylan R. Muir, Fabia Imhof, Francisco J. Martini, and  
981 Sonja B. Hofer. 2016. “Thalamic Nuclei Convey Diverse Contextual Information to Layer 1 of  
982 Visual Cortex.” *Nature Neuroscience* 19 (2): 299–307. <https://doi.org/10.1038/nn.4197>.
- 983 Schuett, Sven, Tobias Bonhoeffer, and Mark Hübener. 2002. “Mapping Retinotopic Structure in  
984 Mouse Visual Cortex with Optical Imaging.” *Journal of Neuroscience* 22 (15): 6549–59.  
985 <https://doi.org/10.1523/jneurosci.22-15-06549.2002>.

- 986 Schwarz, C., and J. Bolz. 1991. "Functional Specificity of a Long-Range Horizontal Connection in  
987 Cat Visual Cortex: A Cross-Correlation Study." *Journal of Neuroscience* 11 (10): 2995–3007.  
988 <https://doi.org/10.1523/jneurosci.11-10-02995.1991>.
- 989 Shepherd, Gordon M.G., Thomas A. Polgruto, and Karel Svoboda. 2003. "Circuit Analysis of  
990 Experience-Dependent Plasticity in the Developing Rat Barrel Cortex." *Neuron*.  
991 [https://doi.org/10.1016/S0896-6273\(03\)00152-1](https://doi.org/10.1016/S0896-6273(03)00152-1).
- 992 Shepherd, Gordon M.G., Armen Stepanyants, Ingrid Bureau, Dmitri Chklovskii, and Karel Svoboda.  
993 2005. "Geometric and Functional Organization of Cortical Circuits." *Nature Neuroscience* 8 (6):  
994 782–90. <https://doi.org/10.1038/nn1447>.
- 995 Shepherd, Gordon M G, and Karel Svoboda. 2005. "Behavioral/Systems/Cognitive Laminar and  
996 Columnar Organization of Ascending Excitatory Projections to Layer 2/3 Pyramidal Neurons in  
997 Rat Barrel Cortex." <https://doi.org/10.1523/JNEUROSCI.1173-05.2005>.
- 998 Smith, Spencer L., Ikuko T. Smith, Tiago Branco, and Michael Häusser. 2013. "Dendritic Spikes  
999 Enhance Stimulus Selectivity in Cortical Neurons in Vivo." *Nature* 503 (7474): 115–20.  
1000 <https://doi.org/10.1038/nature12600>.
- 1001 Sun, Wenzhi, Zhongchao Tan, Brett D. Mensh, and Na Ji. 2016. "Thalamus Provides Layer 4 of  
1002 Primary Visual Cortex with Orientation- and Direction-Tuned Inputs." *Nature Neuroscience* 19  
1003 (2): 308–15. <https://doi.org/10.1038/nn.4196>.
- 1004 Vélez-Fort, Mateo, Charly V. Rousseau, Christian J. Niedworok, Ian R. Wickersham, Ede A. Rancz,  
1005 Alexander P.Y. Brown, Molly Strom, and Troy W. Margrie. 2014. "The Stimulus Selectivity and  
1006 Connectivity of Layer Six Principal Cells Reveals Cortical Microcircuits Underlying Visual  
1007 Processing." *Neuron*. <https://doi.org/10.1016/j.neuron.2014.08.001>.
- 1008 Wagor, Earl, Nancy J. Mangini, and Alan L. Pearlman. 1980. "Retinotopic Organization of Striate  
1009 and Extrastriate Visual Cortex in the Mouse." *The Journal of Comparative Neurology* 193 (1):  
1010 187–202. <https://doi.org/10.1002/cne.901930113>.
- 1011 Wang, C., W. J. Waleszczyk, W. Burke, and B. Dreher. 2007. "Feedback Signals from Cat's Area  
1012 21a Enhance Orientation Selectivity of Area 17 Neurons." *Experimental Brain Research* 182  
1013 (4): 479–90. <https://doi.org/10.1007/s00221-007-1014-0>.
- 1014 Weiler, Simon, Joel Bauer, Mark Hübener, Tobias Bonhoeffer, Tobias Rose, and Volker Scheuss.  
1015 2018. "High-Yield in Vitro Recordings from Neurons Functionally Characterized in Vivo." *Nature*  
1016 *Protocols*. <https://doi.org/10.1038/nprot.2018.026>.
- 1017 Wertz, Adrian, Stuart Trenholm, Keisuke Yonehara, Daniel Hillier, Zoltan Raics, Marcus Leinweber,  
1018 Gergely Szalay, et al. 2015. "Single-Cell-Initiated Monosynaptic Tracing Reveals Layer-Specific  
1019 Cortical Network Modules." *Science*. <https://doi.org/10.1126/science.aab1687>.
- 1020 Wilson, Daniel E., Benjamin Scholl, and David Fitzpatrick. 2018. "Differential Tuning of Excitation  
1021 and Inhibition Shapes Direction Selectivity in Ferret Visual Cortex." *Nature*.  
1022 <https://doi.org/10.1038/s41586-018-0354-1>.

- 1023 Wilson, Daniel E., David E. Whitney, Benjamin Scholl, and David Fitzpatrick. 2016. "Orientation  
1024 Selectivity and the Functional Clustering of Synaptic Inputs in Primary Visual Cortex." *Nature*  
1025 *Neuroscience* 19 (8): 1003–9. <https://doi.org/10.1038/nn.4323>.
- 1026 Xu, Xiangmin, Nicholas D. Olivas, Taruna Ikrar, Tao Peng, Todd C. Holmes, Qing Nie, and Yulin  
1027 Shi. 2016. "Primary Visual Cortex Shows Laminar-Specific and Balanced Circuit Organization  
1028 of Excitatory and Inhibitory Synaptic Connectivity." *Journal of Physiology* 594 (7): 1891–1910.  
1029 <https://doi.org/10.1113/JP271891>.
- 1030 Yang, Weiguo, Yarimar Carrasquillo, Bryan M. Hooks, Jeanne M. Nerbonne, and Andreas  
1031 Burkhalter. 2013. "Distinct Balance of Excitation and Inhibition in an Interareal Feedforward and  
1032 Feedback Circuit of Mouse Visual Cortex." *Journal of Neuroscience* 33 (44): 17373–84.  
1033 <https://doi.org/10.1523/JNEUROSCI.2515-13.2013>.
- 1034 Young, Hedi, Beatriz Belbut, Margarida Baeta, and Leopoldo Petreanu. 2019. "Laminar-Specific  
1035 Cortico-Cortical Loops in Mouse Visual Cortex." *BioRxiv* 4: 773085.  
1036 <https://doi.org/10.1101/773085>.
- 1037 Znamenskiy, Petr, Mean-Hwan Kim, Dylan R Muir, Maria Florencia Iacaruso, Sonja B Hofer, and  
1038 Thomas D Mrsic-Flogel. 2018. "Functional Selectivity and Specific Connectivity of Inhibitory  
1039 Neurons in Primary Visual Cortex." *BioRxiv*, 294835. <https://doi.org/10.1101/294835>.
- 1040
